# Supplementary material
Source: Royal Society of Chemistry journal article supplement (doi:10.1039/d6dt00474a)
Supplement: d6dt00474a1.pdf [file d6dt00474a1.pdf]

## Supporting Information for

# Aluminum Dihydride from E(IV) Precursors (E = Si, Ge) and Its Bond-Activation Reactivities

Hemant Kumar,<sup>a</sup> Steven P. Kelley,<sup>a</sup> Tanya Batra,<sup>b</sup> Selvarajan Nagendran,<sup>b</sup> Justin R. Walensky\*<sup>a</sup>

<sup>a</sup> Department of Chemistry, University of Missouri, Columbia, MO 65211 USA, Email: [walenskyj@missouri.edu](mailto:walenskyj@missouri.edu)

<sup>b</sup> Department of Chemistry, Indian Institute of Delhi, Hauz Khas, New Delhi 110016, India.

## Table of Contents

|                    |                                                                                                                                            | Page No. |
|--------------------|--------------------------------------------------------------------------------------------------------------------------------------------|----------|
|                    | Experimental characterization data                                                                                                         | 3        |
| <b>Figure S1</b>   | <sup>1</sup> H NMR (400 MHz, C <sub>6</sub> D <sub>6</sub> 298 K) of <b>1</b> .                                                            | 3        |
| <b>Figure S2</b>   | <sup>13</sup> C{ <sup>1</sup> H} NMR (101 MHz, C <sub>6</sub> D <sub>6</sub> 298 K) of <b>1</b> .                                          | 3        |
| <b>Figure S3</b>   | <sup>29</sup> Si{ <sup>1</sup> H} NMR (79.5 MHz, C <sub>6</sub> D <sub>6</sub> 298 K) of <b>1</b> .                                        | 4        |
| <b>Figure S4</b>   | <sup>29</sup> Si NMR (79.5 MHz, C <sub>6</sub> D <sub>6</sub> 298 K) of <b>1</b> .                                                         | 4        |
| <b>Figure S5</b>   | FT-IR vibrational spectrum of <b>1</b> , obtained using ATR.                                                                               | 5        |
|                    | Synthesis of [(ATI)AlH <sub>2</sub> ] <b>2</b>                                                                                             | 5        |
| <b>Figure S6</b>   | <sup>1</sup> H NMR (400 MHz, C <sub>6</sub> D <sub>6</sub> , 298 K) of <b>2</b> , solvent impurities are present (THF and pentane).        | 6        |
| <b>Figure S7</b>   | <sup>13</sup> C{ <sup>1</sup> H} NMR (101 MHz, C <sub>6</sub> D <sub>6</sub> , 298 K) of <b>2</b> , solvent impurity is present (pentane). | 6        |
| <b>Figure S8</b>   | <sup>27</sup> Al NMR (130.3 MHz, C <sub>6</sub> D <sub>6</sub> , 298 K) of <b>2</b> .                                                      | 7        |
| <b>Figure S9</b>   | <sup>1</sup> H DOSY NMR spectrum of compound <b>2</b> .                                                                                    | 7        |
| <b>Figure S10</b>  | FT-IR vibrational spectrum of <b>2</b> , obtained using ATR.                                                                               | 8        |
| <b>Figure S11</b>  | <sup>1</sup> H NMR (500 MHz, C <sub>6</sub> D <sub>6</sub> , 298 K) of <b>3</b> .                                                          | 9        |
| <b>Figure S11a</b> | <sup>1</sup> H NMR (500 MHz, C <sub>6</sub> D <sub>6</sub> , 298 K) of <b>3</b> (zoomed in).                                               | 9        |
| <b>Figure S12</b>  | <sup>13</sup> C NMR (125MHz, C <sub>6</sub> D <sub>6</sub> , 298 K) of <b>3</b> .                                                          | 10       |
| <b>Figure S13</b>  | FT-IR vibrational spectrum of <b>3</b> , obtained using ATR.                                                                               | 10       |
| <b>Figure S14</b>  | <sup>1</sup> H NMR (400 MHz, C <sub>6</sub> D <sub>6</sub> , 298 K) of <b>4</b> , solvent impurities are present (toluene and pentane).    | 11       |
| <b>Figure S15</b>  | <sup>13</sup> C{ <sup>1</sup> H} NMR (101 MHz, C <sub>6</sub> D <sub>6</sub> , 298 K) of <b>4</b> .                                        | 12       |

|                   |                                                                                                                                                                                                                                     |    |
|-------------------|-------------------------------------------------------------------------------------------------------------------------------------------------------------------------------------------------------------------------------------|----|
| <b>Figure S16</b> | $^{13}\text{C}\{^1\text{H}\}$ NMR (101 MHz, $\text{C}_6\text{D}_6$ , 298 K) of <b>4</b> (aliphatic region).                                                                                                                         | 12 |
| <b>Figure S17</b> | $^{13}\text{C}\{^1\text{H}\}$ NMR (101 MHz, $\text{C}_6\text{D}_6$ , 298 K) of <b>4</b> (aromatic region).                                                                                                                          | 13 |
| <b>Figure S18</b> | $^1\text{H}$ NMR (400 MHz, $\text{C}_6\text{D}_6$ , 298 K) of <b>5</b> .                                                                                                                                                            | 13 |
| <b>Figure S19</b> | $^{13}\text{C}\{^1\text{H}\}$ NMR (125 MHz, $\text{C}_6\text{D}_6$ , 298 K) of <b>5</b> (aromatic region).                                                                                                                          | 14 |
| <b>Figure S20</b> | Stacked $^1\text{H}$ -NMR spectra of <b>2</b> ATIH + $\text{AlH}_3\cdot\text{NEt}_3$ after 1h and 12h.                                                                                                                              | 14 |
| <b>Figure S21</b> | $^1\text{H}$ NMR (500 MHz, $\text{C}_6\text{D}_6$ , 298 K) of <b>2</b> , solvent impurities are present (toluene and pentane).                                                                                                      | 15 |
|                   | Synthesis of $[(\text{ATI})\text{AlS}]_2$ <b>5</b>                                                                                                                                                                                  | 15 |
| <b>Figure S22</b> | $^1\text{H}$ NMR (400 MHz, $\text{CDCl}_3$ , 298 K) of <b>6</b> , integration <b>e</b> is higher than expected due to the merging of residual $\text{CHCl}_3$ in $\text{CDCl}_3$ solvent, impurities are present (THF and toluene). | 16 |
| <b>Figure S23</b> | $^{13}\text{C}\{^1\text{H}\}$ NMR (101 MHz, $\text{CDCl}_3$ , 298 K) of <b>6</b> .                                                                                                                                                  | 17 |
| <b>Figure S24</b> | Stacked $^1\text{H}$ -NMR spectra of <b>2</b> + $\text{CS}_2$ at 0 h and 3 h.                                                                                                                                                       | 17 |
| <b>Figure S25</b> | $^1\text{H}$ NMR (400 MHz, $\text{CDCl}_3$ , 298 K) of <b>7</b> , integration <b>e</b> is higher than expected due to the merging of residual $\text{CHCl}_3$ in $\text{CDCl}_3$ solvent, impurity is present (THF).                | 18 |
| <b>Figure S26</b> | $^{13}\text{C}\{^1\text{H}\}$ NMR (101 MHz, $\text{CDCl}_3$ , 298 K) of <b>7</b> .                                                                                                                                                  | 19 |
|                   | Crystal structure refinements                                                                                                                                                                                                       | 19 |
|                   | References                                                                                                                                                                                                                          | 23 |

Experimental characterization data:

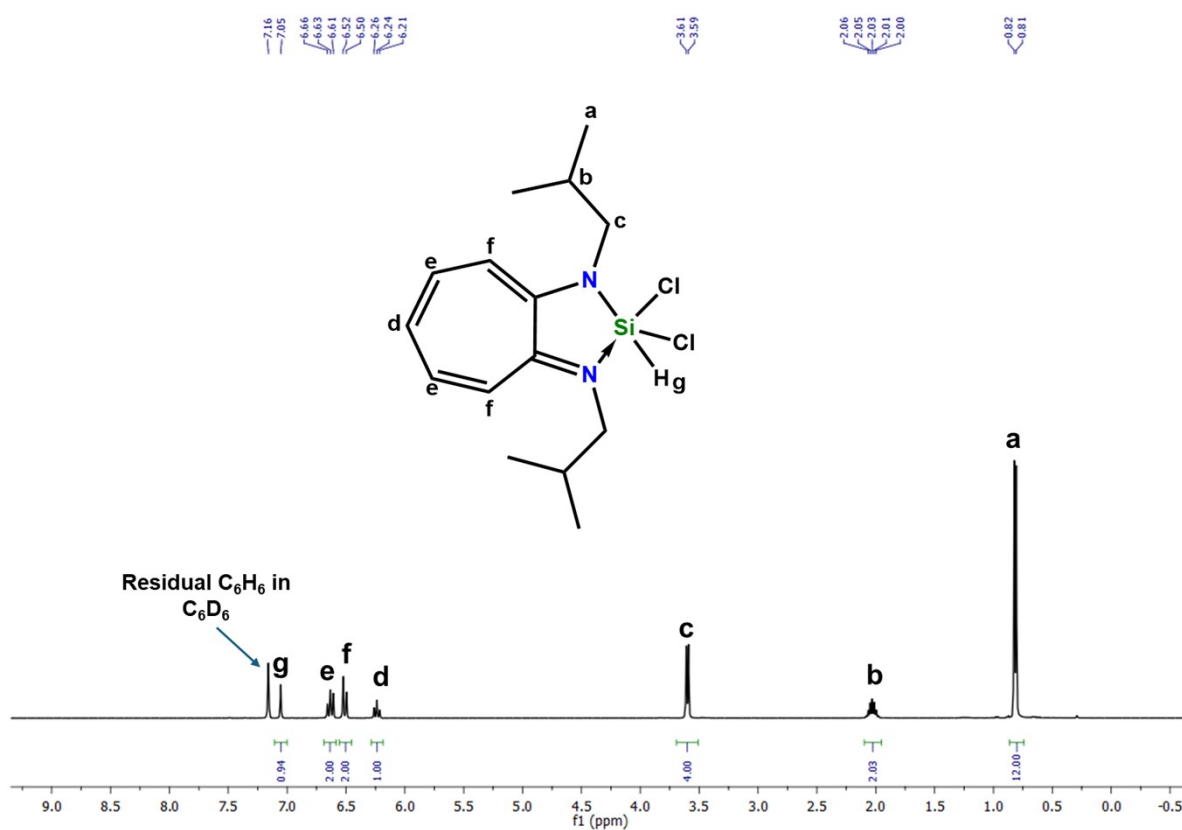

Figure S1:  $^1\text{H}$  NMR (400 MHz,  $\text{C}_6\text{D}_6$ , 298 K) of **1**.

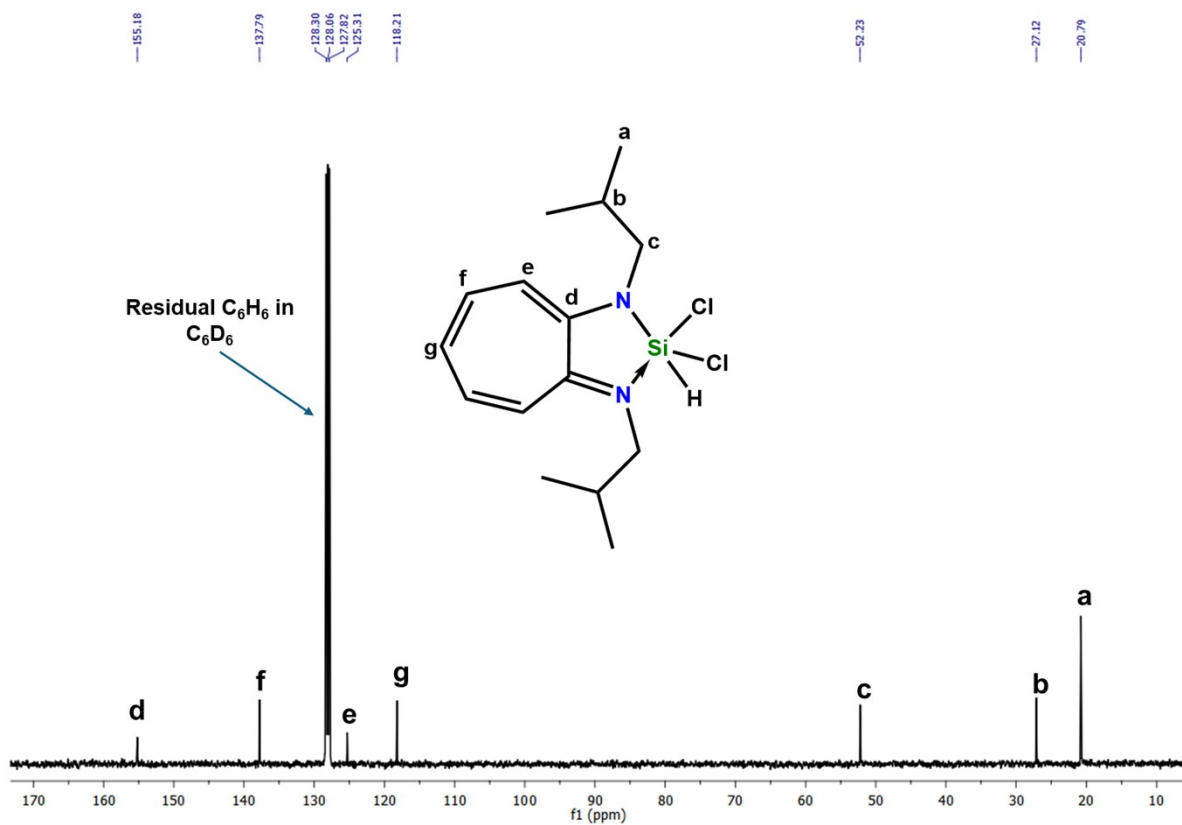

Figure S2:  $^{13}\text{C}\{^1\text{H}\}$  NMR (101 MHz,  $\text{C}_6\text{D}_6$ , 298 K) of **1**.

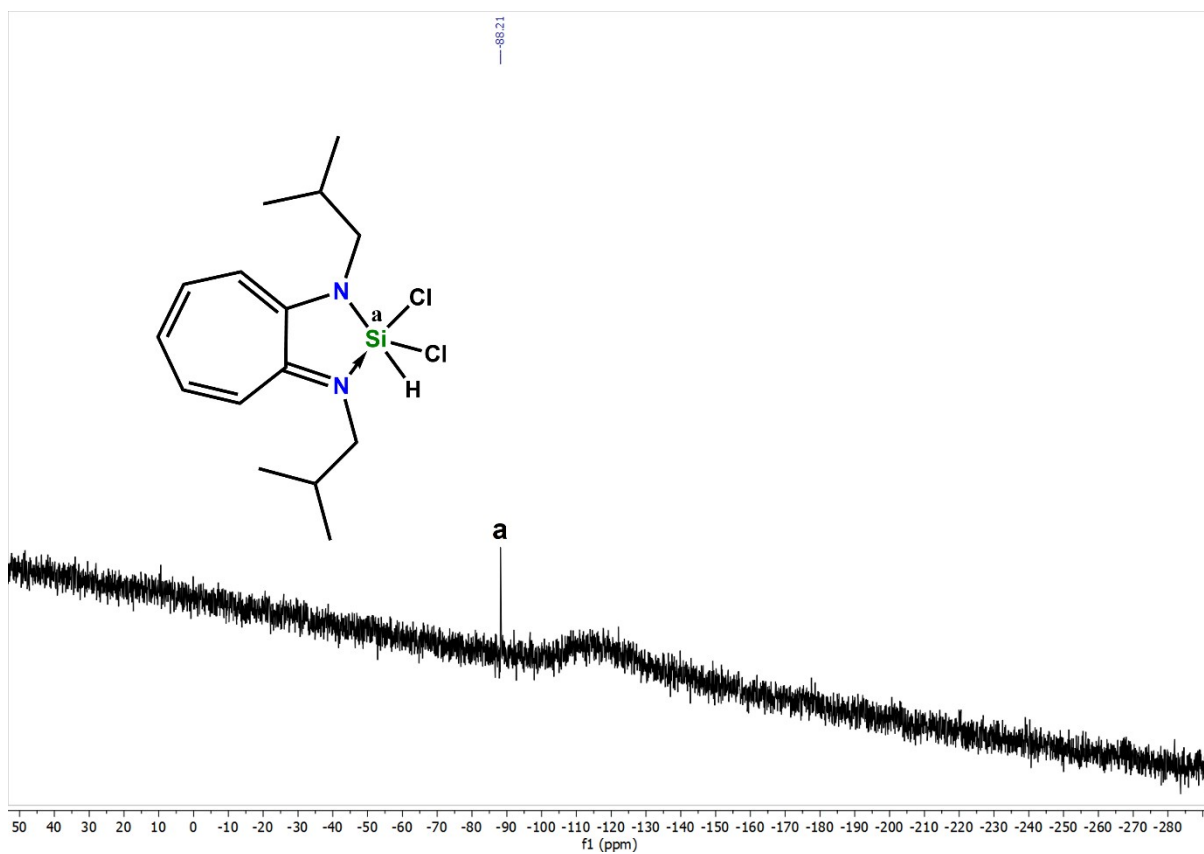

**Figure S3:**  $^{29}\text{Si}\{^1\text{H}\}$  NMR (79.5 MHz,  $\text{C}_6\text{D}_6$  298 K) of **1**.

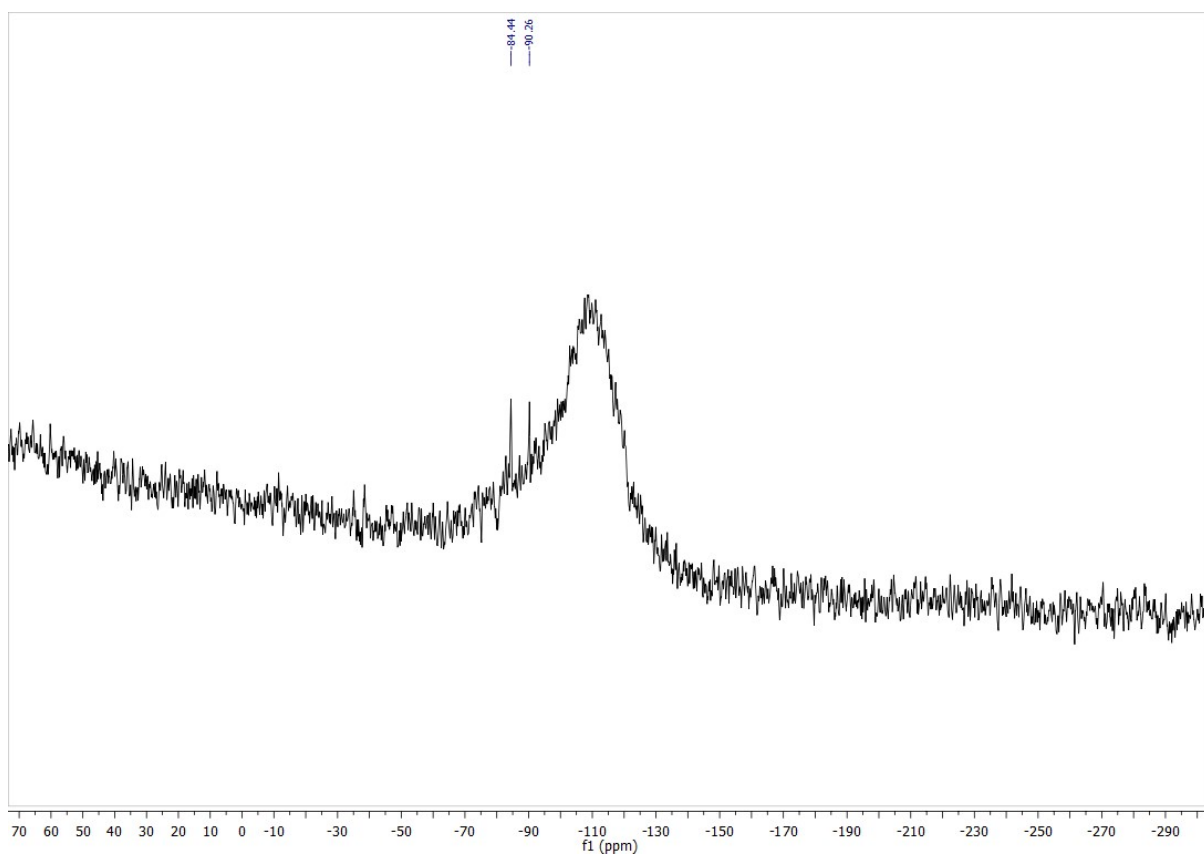

**Figure S4:**  $^{29}\text{Si}$  NMR (79.5 MHz,  $\text{C}_6\text{D}_6$  298 K) of **1**.

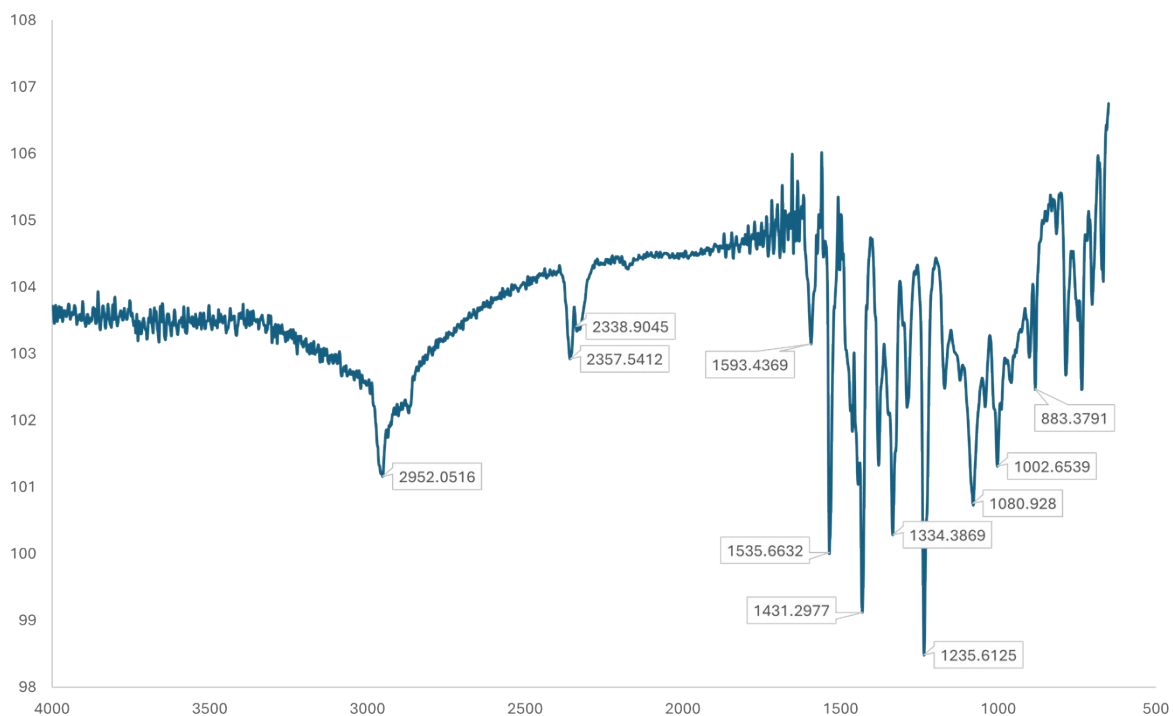

**Figure S5:** FT-IR vibrational spectrum of **1**, obtained using ATR.

### Synthesis of [(ATI)AlH<sub>2</sub>] **2**.

**Alternative procedure.** To the solution of [(ATI)SiCl<sub>3</sub>] (0.10 g, 0.27 mmol) or [(ATI)GeCl<sub>3</sub>] (0.10 g, 0.24 mmol) in THF, LiAlH<sub>4</sub> (for [(ATI)SiCl<sub>3</sub>]: 0.041 g, 1.08 mmol; for [(ATI)GeCl<sub>3</sub>]: 0.036 g, 0.96 mmol) was added at -30 °C, and the reaction mixture was allowed to be stirred for 2 h at room temperature. After that, the reaction mixture was filtered through a fine-porosity frit. The solvent was removed under reduced pressure, and the remaining solid was extracted in toluene. This solution was concentrated and kept at -30 °C in the freezer to afford analytically pure, yellow-colored crystals of compound **2**. For [(ATI)SiCl<sub>3</sub>]: Yield: 80 %; For [(ATI)GeCl<sub>3</sub>]: Yield: 81 %.

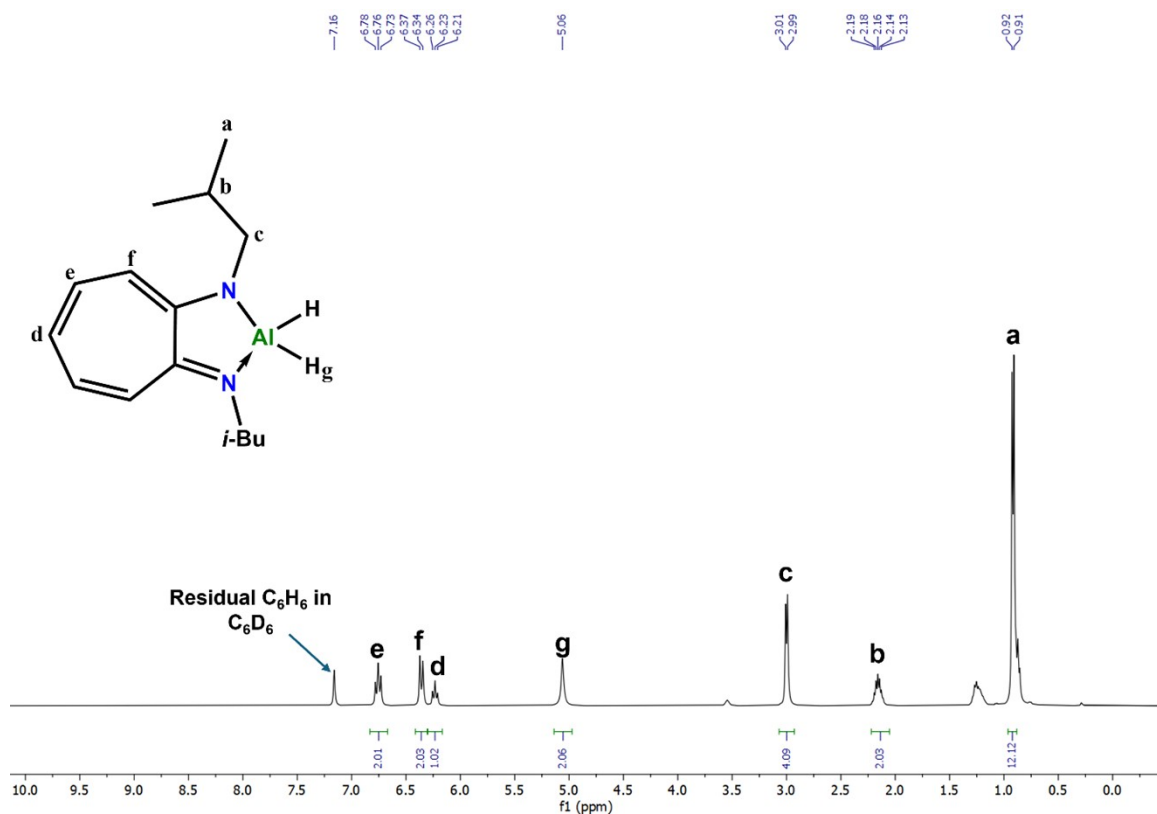

**Figure S6:**  $^1\text{H}$  NMR (400 MHz,  $\text{C}_6\text{D}_6$ , 298 K) of **2**, solvent impurities are present (THF and pentane).

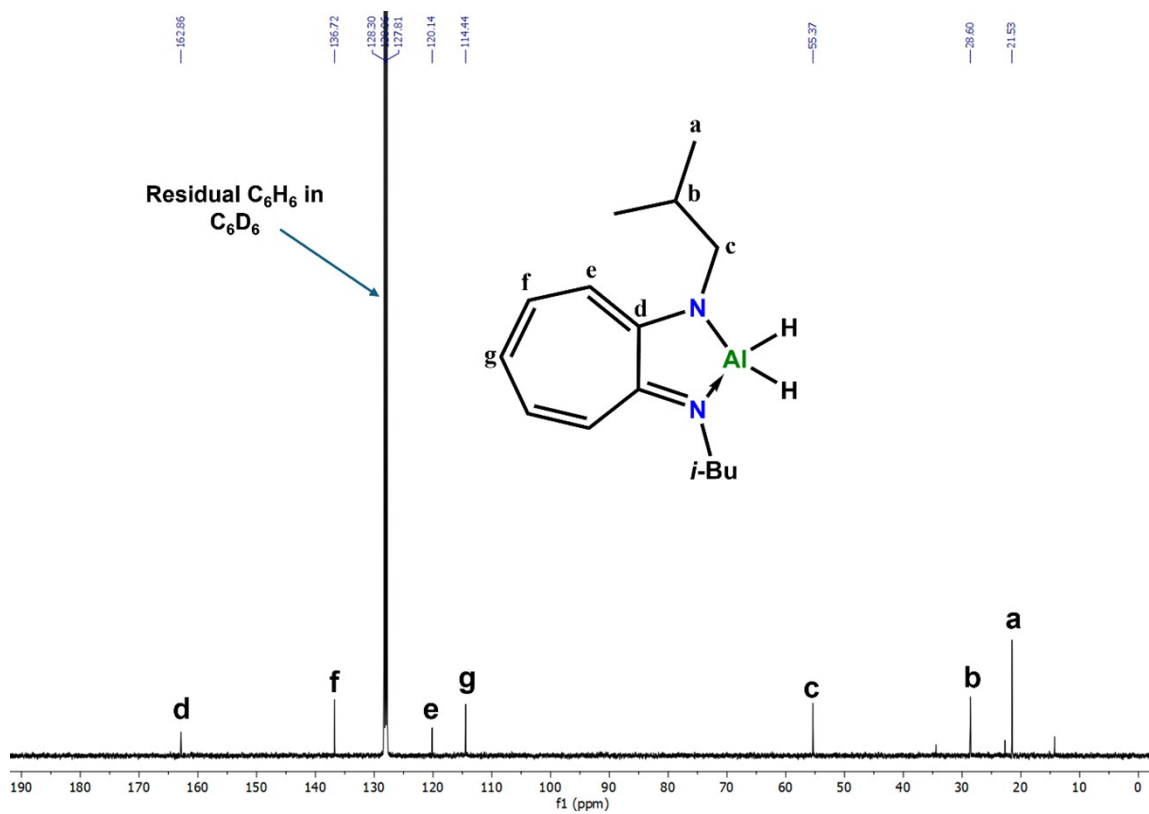

**Figure S7:**  $^{13}\text{C}\{^1\text{H}\}$  NMR (101 MHz,  $\text{C}_6\text{D}_6$ , 298 K) of **2**, solvent impurity is present (pentane).

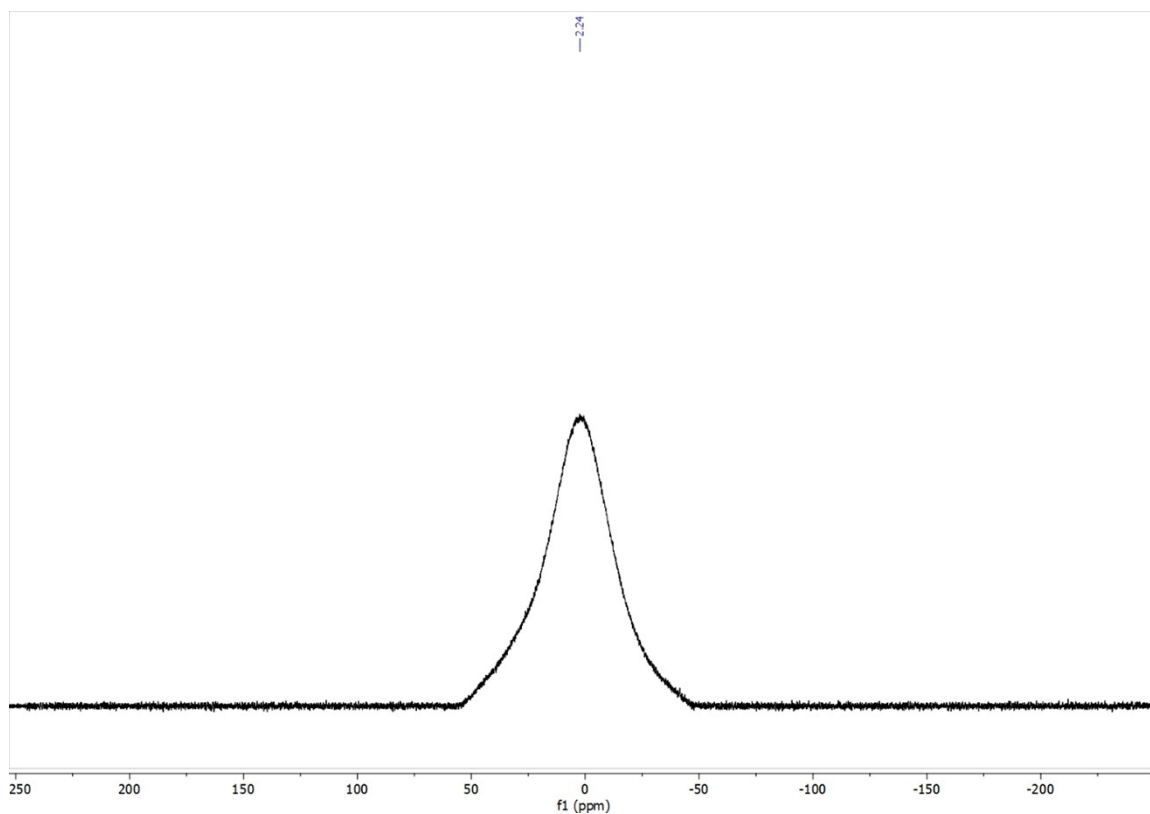

**Figure S8:**  $^{27}\text{Al}$  NMR (130.3 MHz,  $\text{C}_6\text{D}_6$ , 298 K) of **2**.

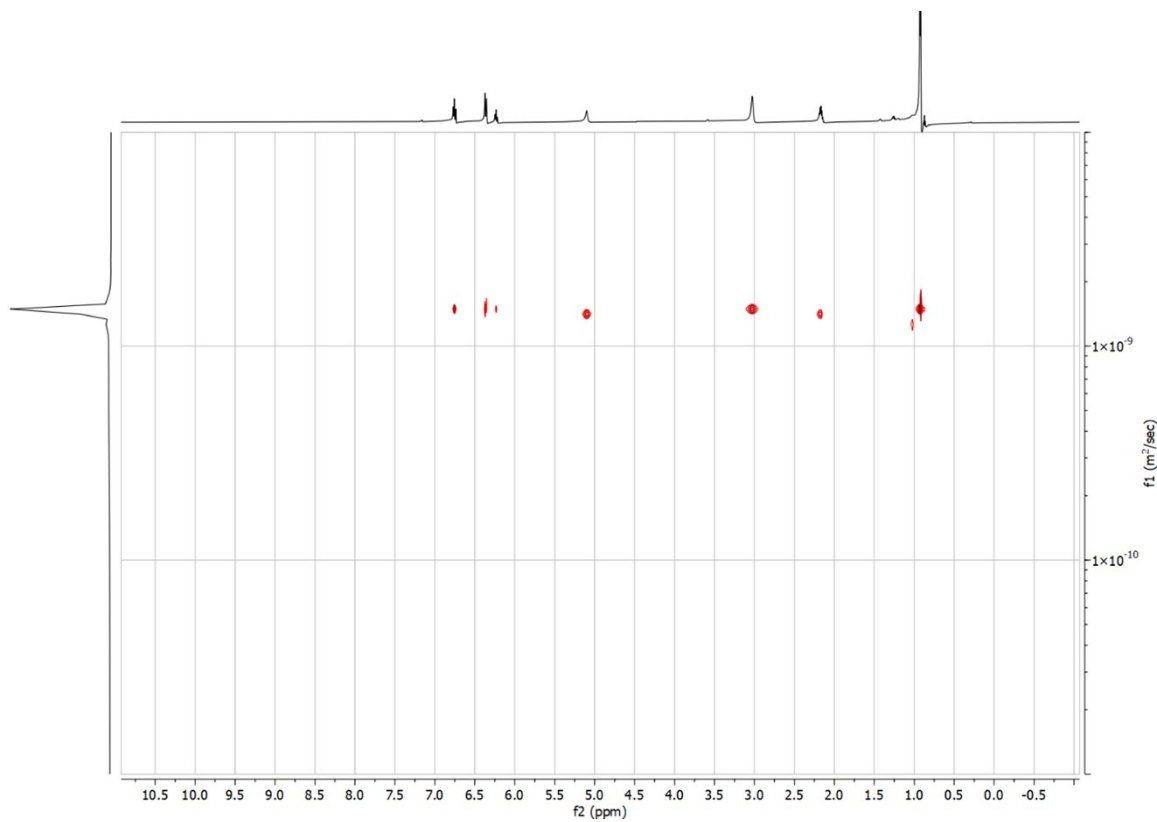

**Figure S9:**  $^1\text{H}$  DOSY NMR spectrum of compound **2**. ( $D = 1.498 \times 10^{-9} \text{ m}^2/\text{s}$ ). After several measurements, the diffusion coefficient ( $D$ ) consistently appeared higher than expected for the monomer (with value around  $1.264 \times 10^{-9} \text{ m}^2/\text{s}$ ), which corresponds to a lower calculated

molecular weight ( $185 \text{ g/mol}$  for  $D = 1.498 \times 10^{-9} \text{ m}^2/\text{s}$ ). Since this molecular weight is closest to that of the monomeric species  $[(\text{ATI})\text{AlH}_2]$ , we concluded that compound **2** exists as a monomer in solution.

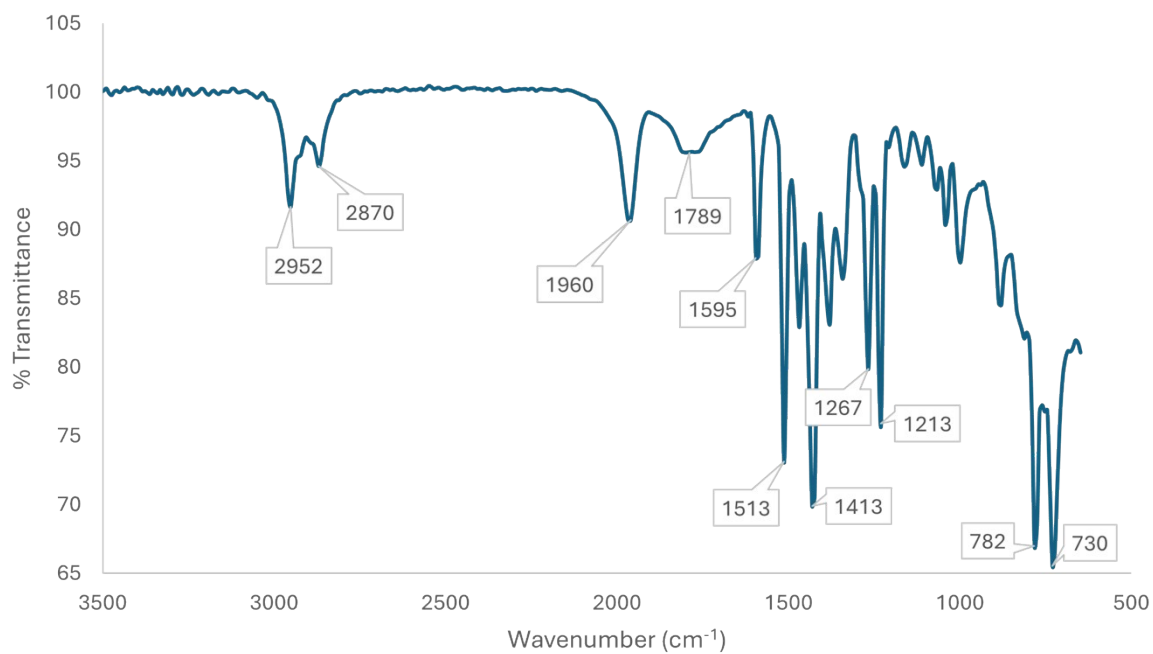

**Figure S10:** FT-IR vibrational spectrum of **2**, obtained using ATR.

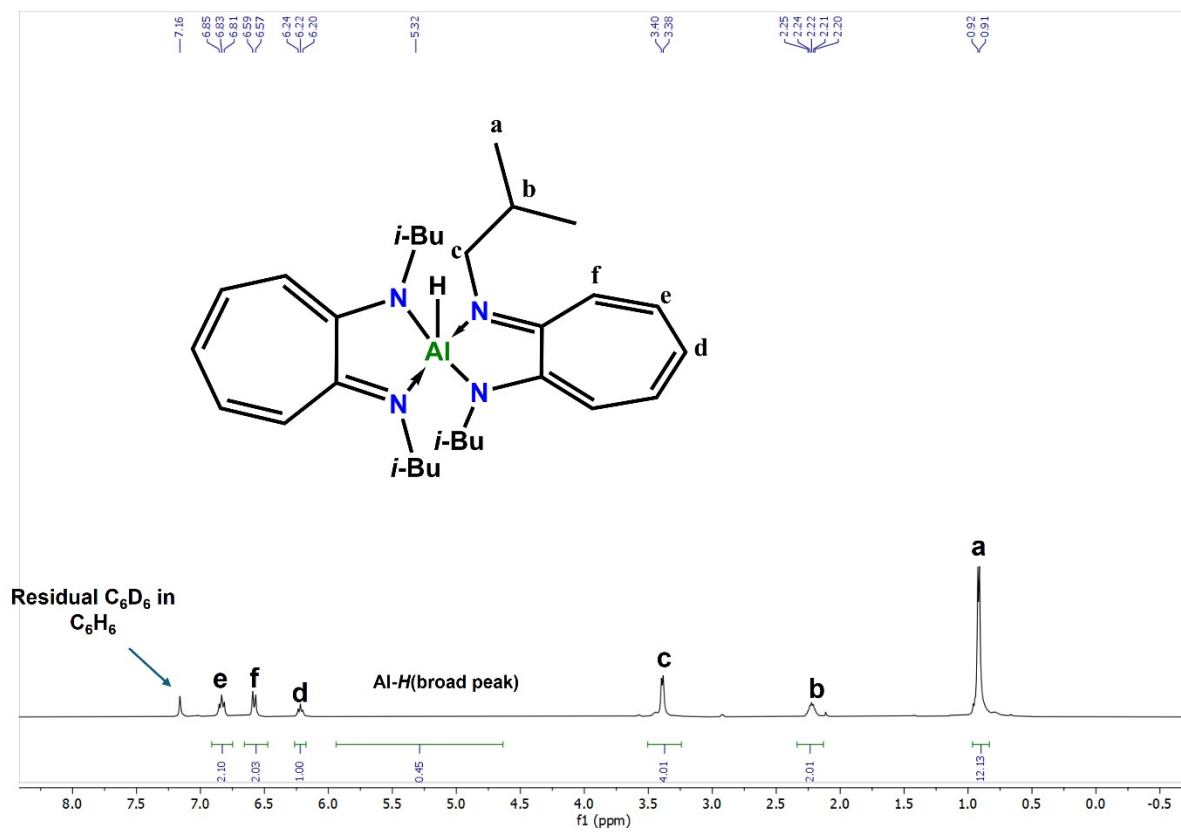

**Figure S11:**  $^1\text{H}$  NMR (500 MHz,  $\text{C}_6\text{D}_6$ , 298 K) of **3**.

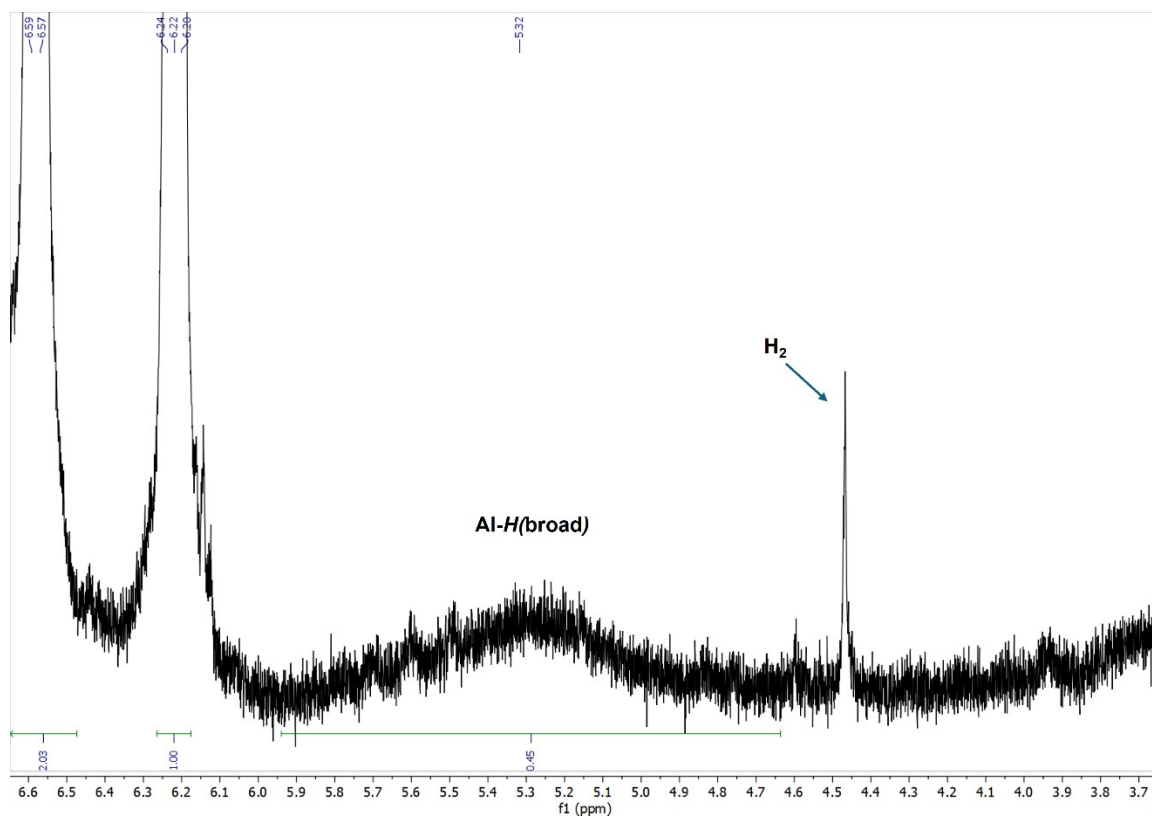

**Figure S11a:**  $^1\text{H}$  NMR (500 MHz,  $\text{C}_6\text{D}_6$ , 298 K) of **3** (zoomed in).

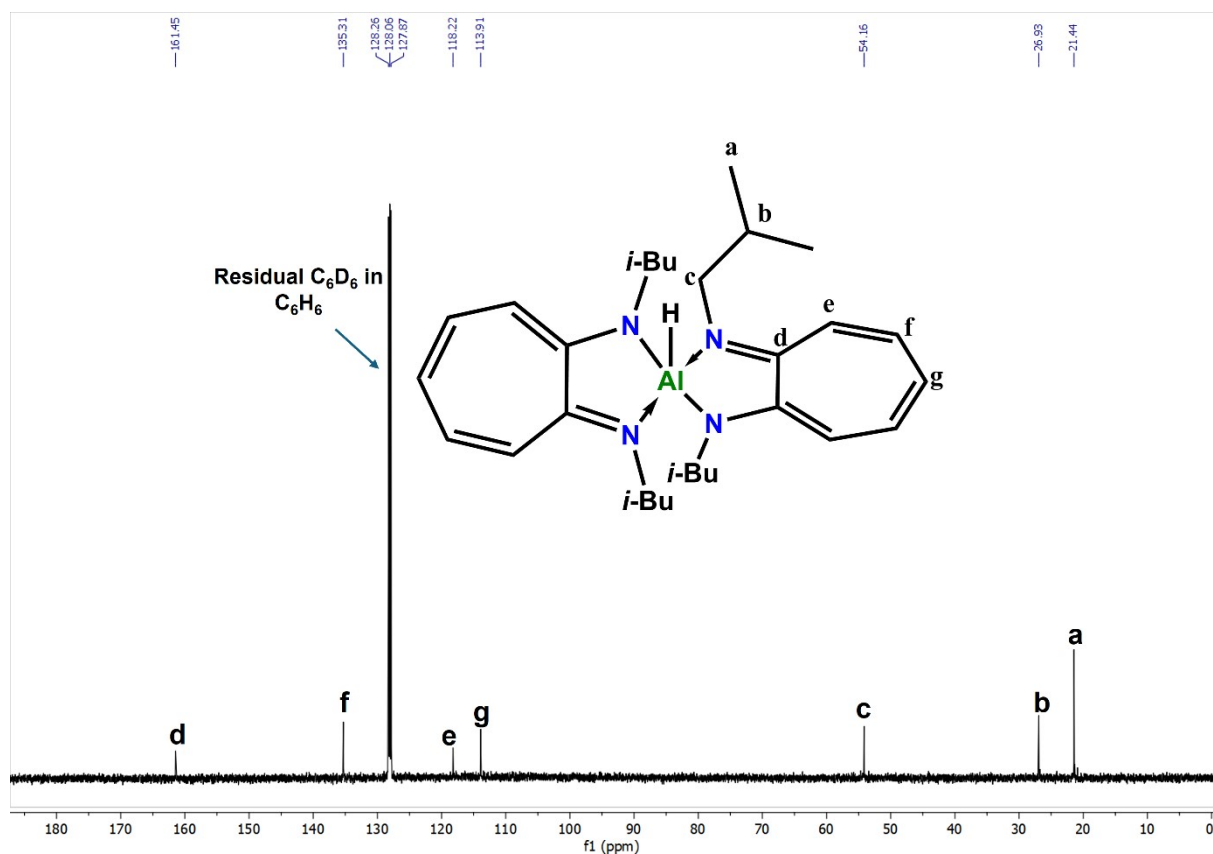

**Figure S12:**  $^{13}\text{C}$  NMR (125MHz,  $\text{C}_6\text{D}_6$ , 298 K) of **3**.

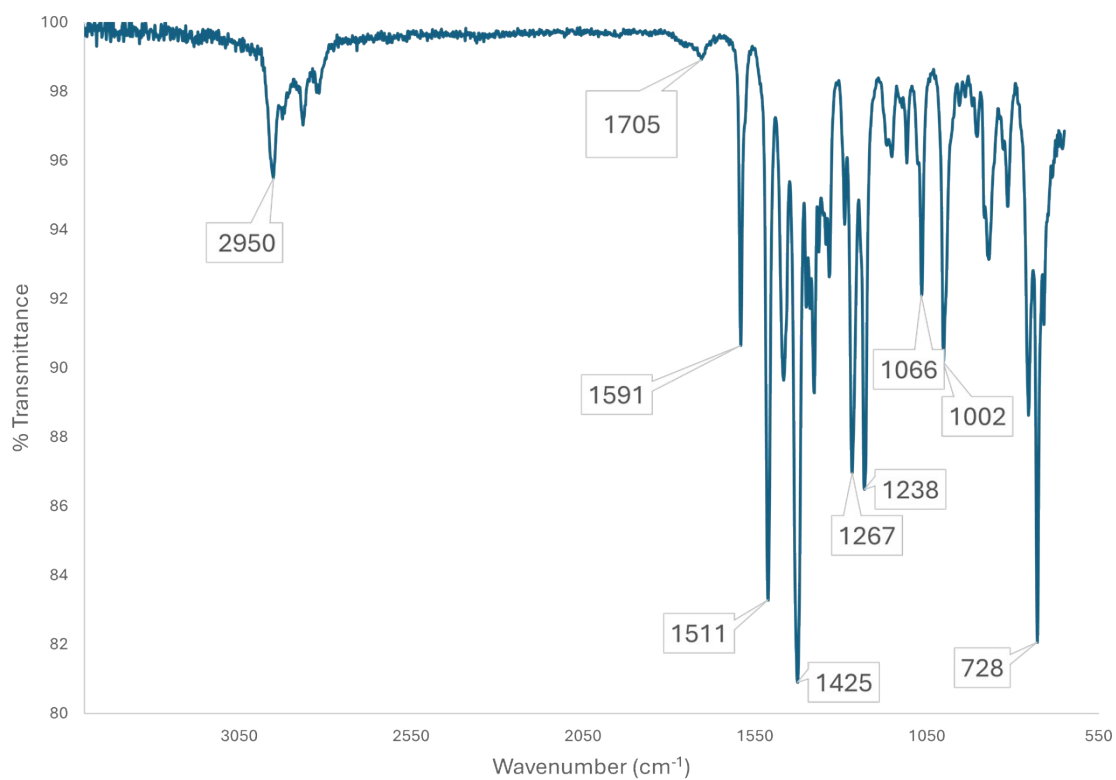

**Figure S13:** FT-IR vibrational spectrum of **3**, obtained using ATR.

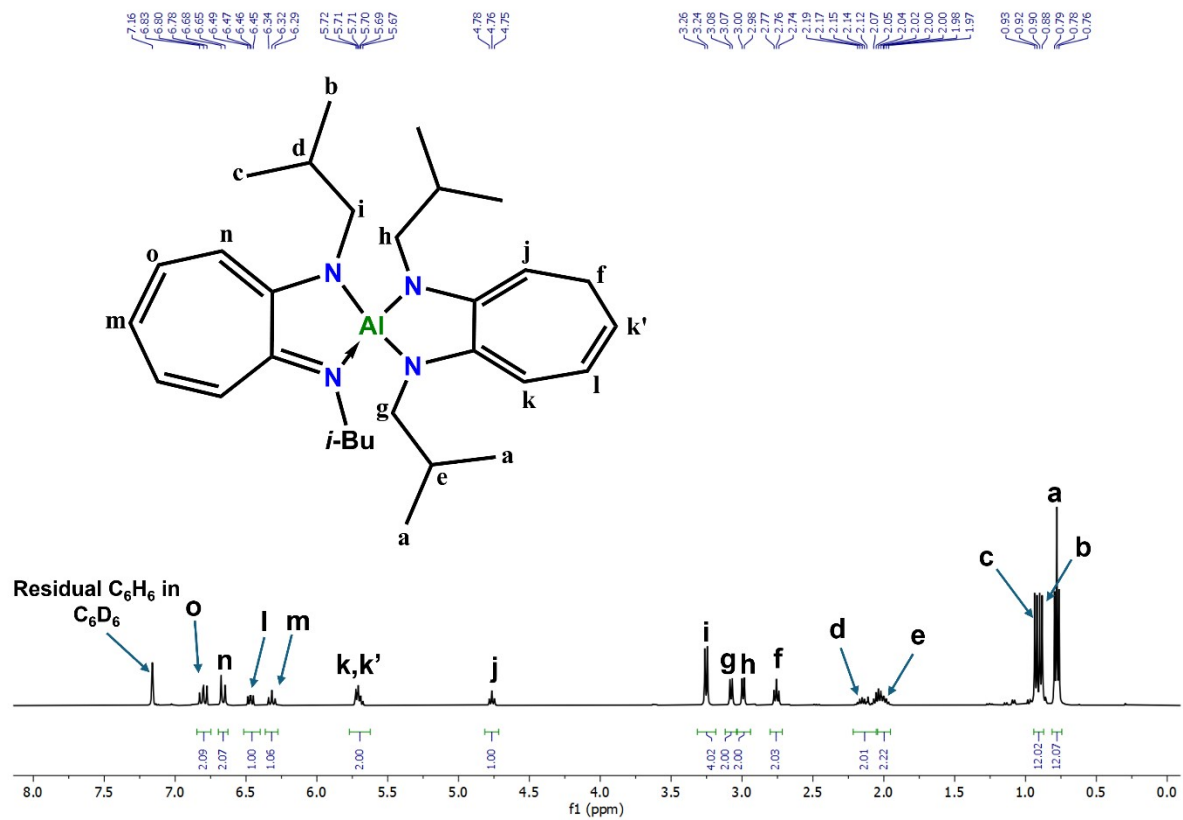

**Figure S14:**  $^1\text{H}$  NMR (400 MHz,  $\text{C}_6\text{D}_6$ , 298 K) of **4**, solvent impurities are present (toluene and pentane).

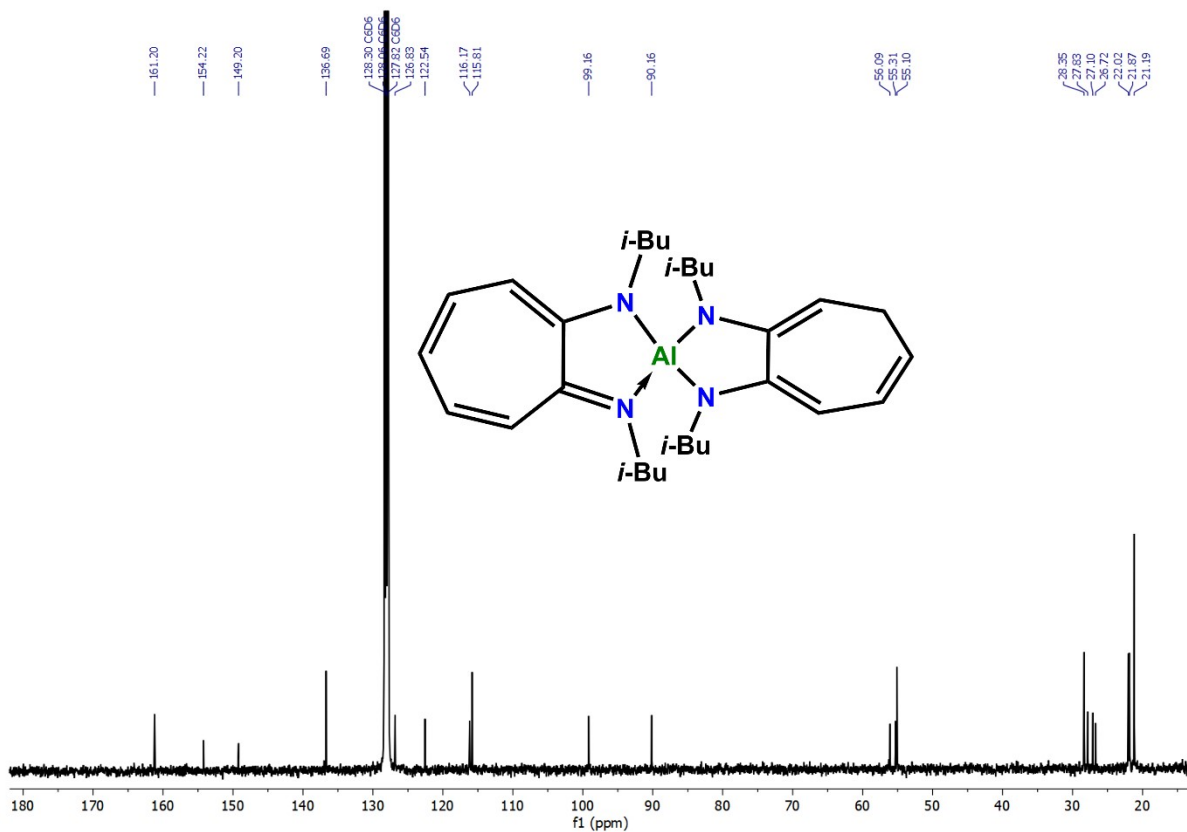

Figure S15:  $^{13}\text{C}\{^1\text{H}\}$  NMR (101 MHz,  $\text{C}_6\text{D}_6$ , 298 K) of **4**.

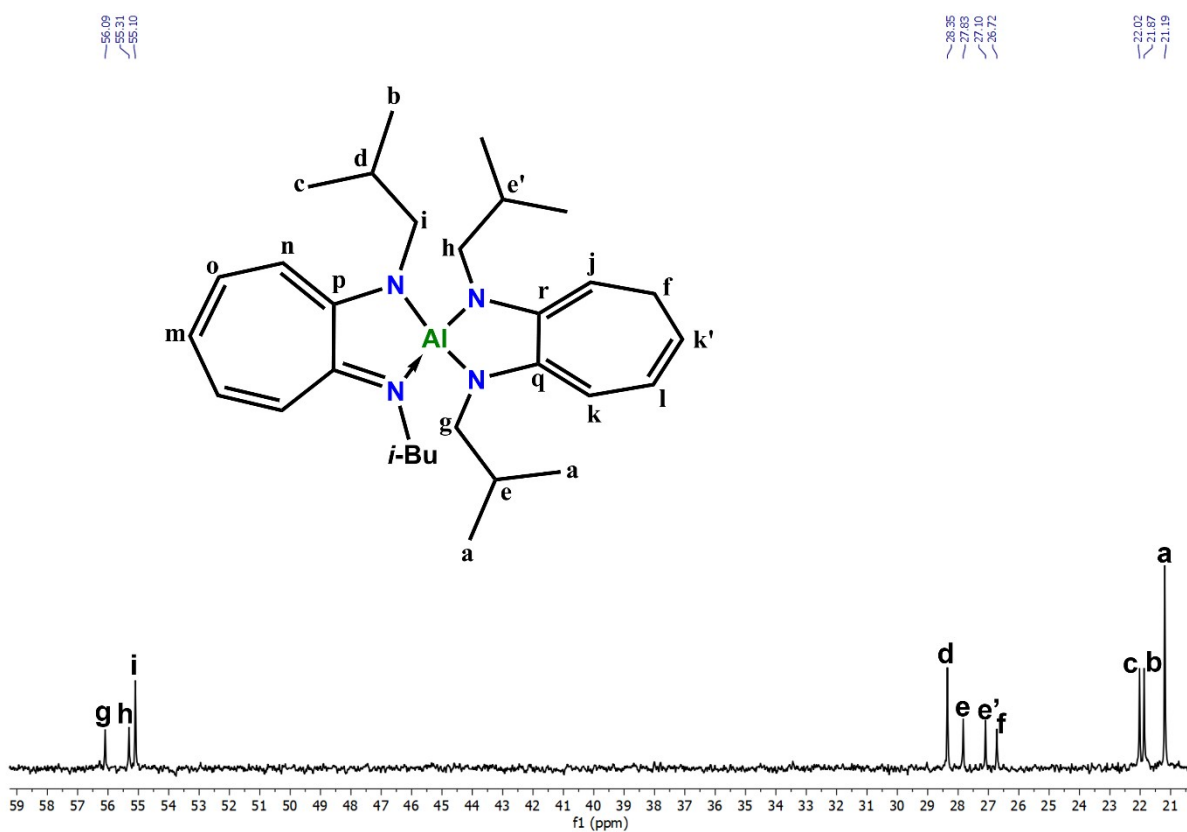

Figure S16:  $^{13}\text{C}\{^1\text{H}\}$  NMR (101 MHz,  $\text{C}_6\text{D}_6$ , 298 K) of **4** (aliphatic region).

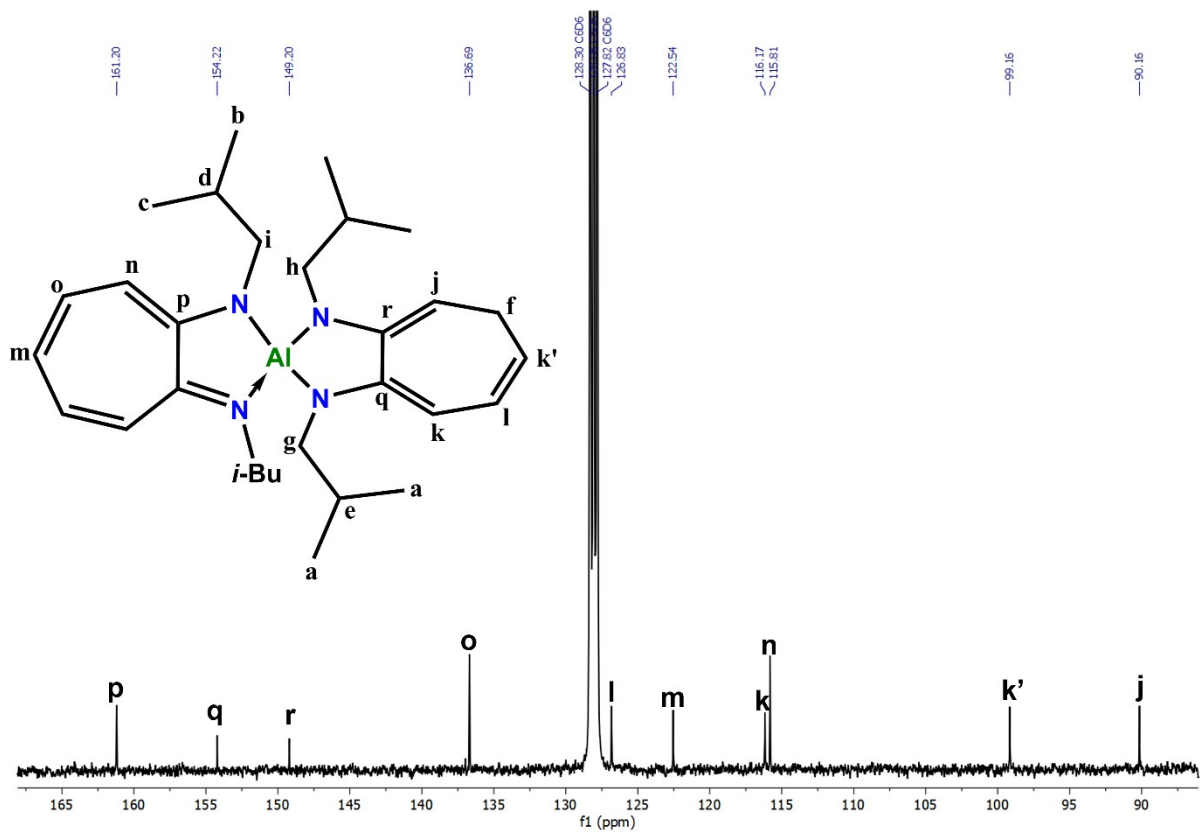

Figure S17:  $^{13}\text{C}\{^1\text{H}\}$  NMR (101 MHz,  $\text{C}_6\text{D}_6$ , 298 K) of 4 (aromatic region).

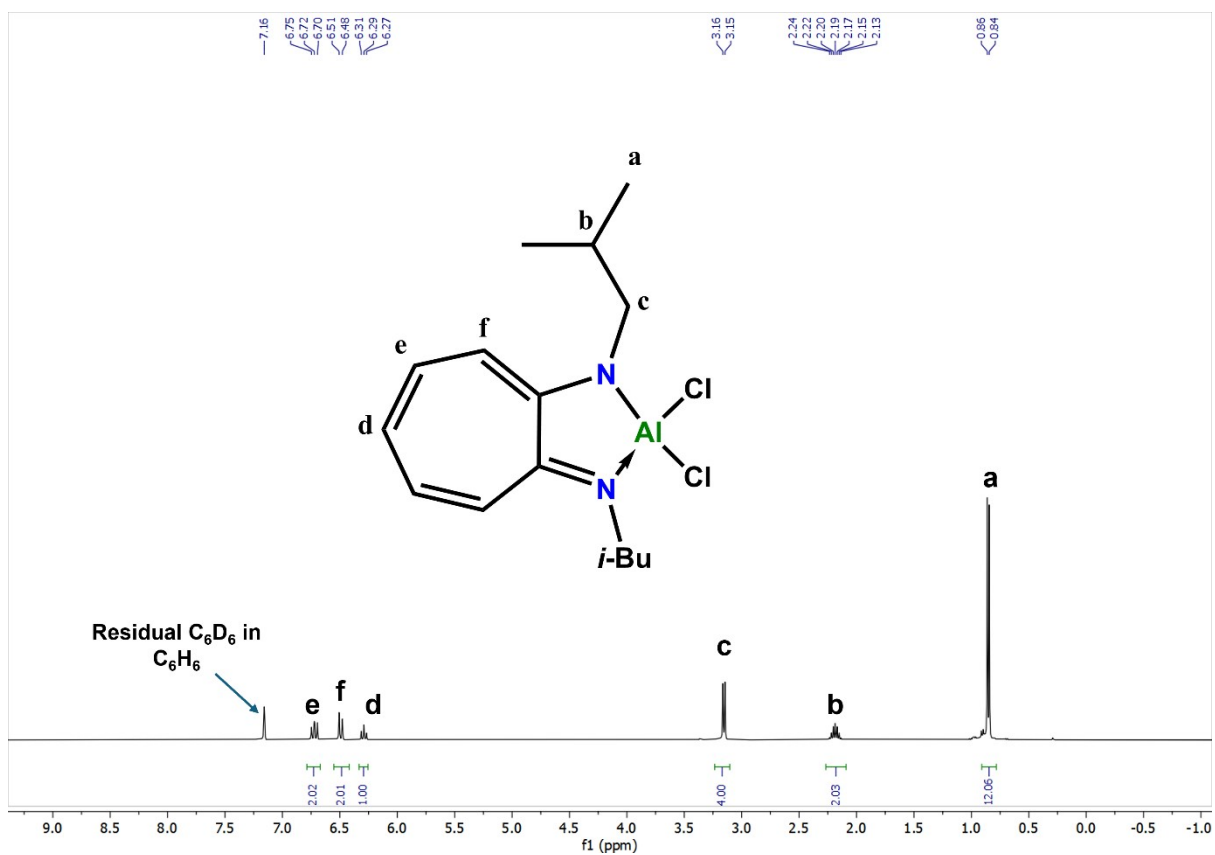

Figure S18:  $^1\text{H}$  NMR (400 MHz,  $\text{C}_6\text{D}_6$ , 298 K) of 5.

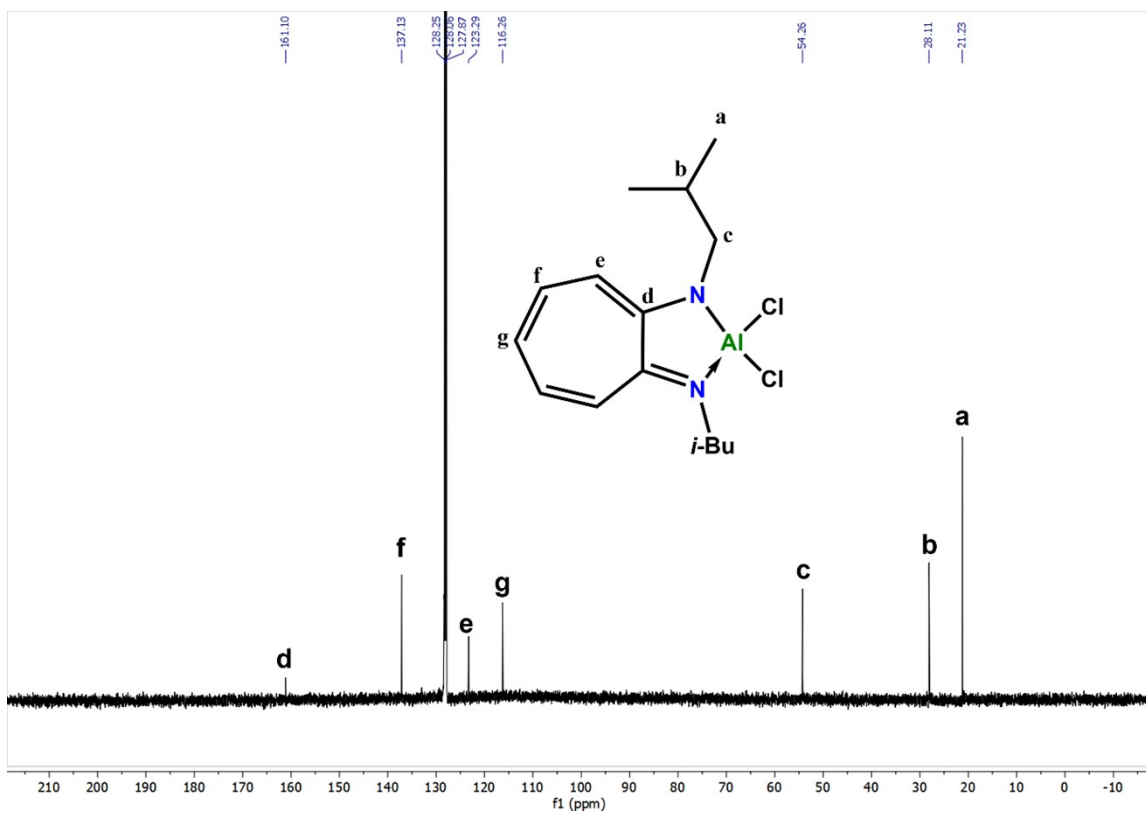

Fig

re S19:  $^{13}\text{C}\{^1\text{H}\}$  NMR (125 MHz,  $\text{C}_6\text{D}_6$  298 K) of **5** (aromatic region).

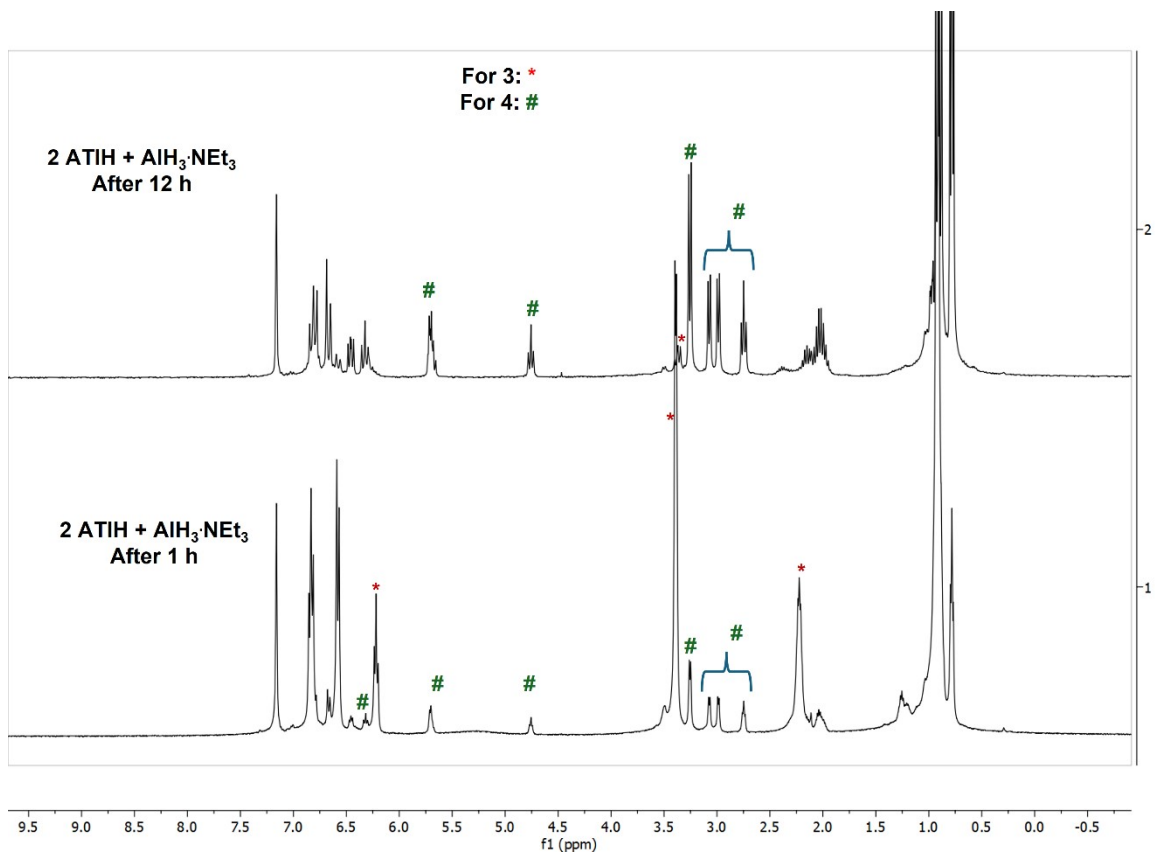

Figure S20: Stacked  $^1\text{H}$ -NMR spectra of **2** ATIH +  $\text{AlH}_3\cdot\text{NEt}_3$  after 1h and 12 h.

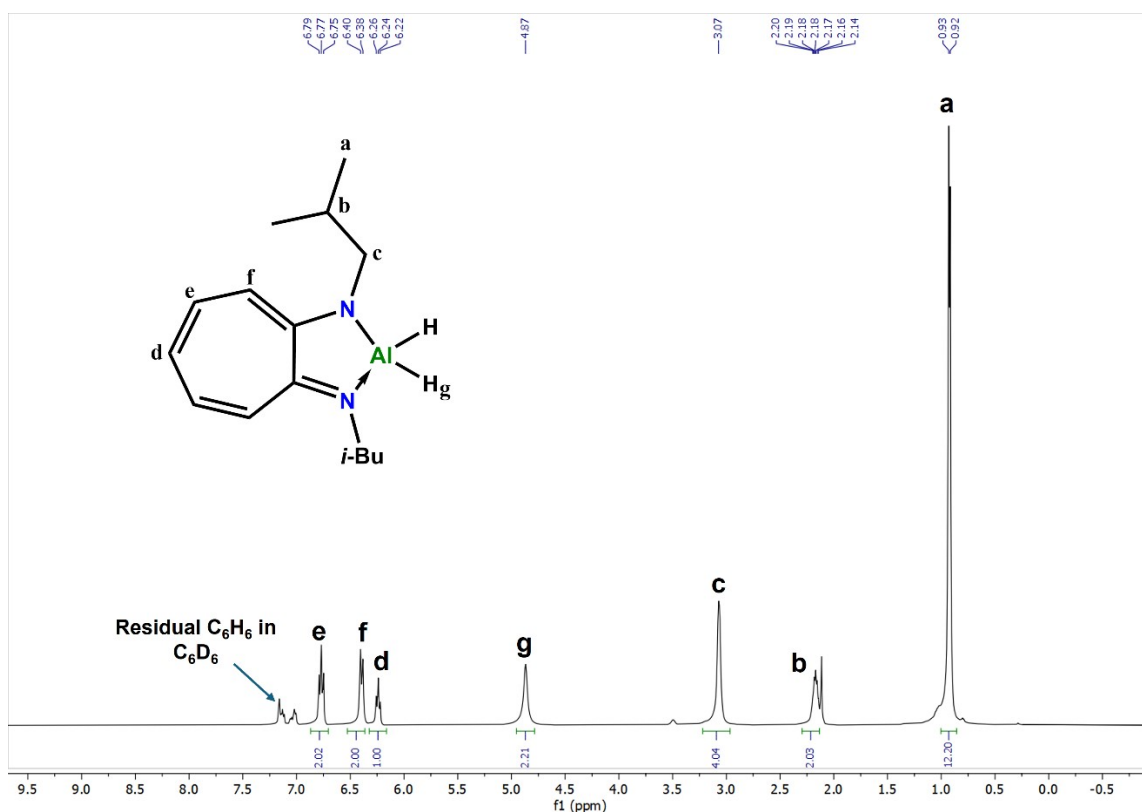

**Figure S21:**  $^1\text{H}$  NMR (500 MHz,  $\text{C}_6\text{D}_6$ , 298 K) of **2**, solvent impurities are present (toluene and pentane).

### Synthesis of $[(\text{ATI})\text{AIS}]_2$ **6**.

**Alternative procedure A.** To a solution of compound **2** (0.10, 0.38 mmol) in toluene (5 mL),  $\text{S}_8$  (0.013 g, 0.05 mmol) was added, and the reaction mixture was stirred for 2 h. After the reaction time, a yellow-coloured precipitate formed. The reaction mixture was filtered through a fine-porosity frit, and the residue was washed with toluene ( $2 \times 2$  mL). The residue was then collected, and the residual solvent was removed under reduced pressure to afford a yellow-colored analytically pure compound **6**. Single crystals suitable for X-ray diffraction studies were obtained from a saturated solution of compound **6** in THF at  $-40$  °C. Yield: 85 %.

**Alternative procedure B.** To a reddish-yellow solution of compound **4** (0.080, 0.16 mmol) in toluene (5 mL),  $\text{S}_8$  (0.005 g, 0.02 mmol) was added, and the reaction mixture was stirred for 2 h. After the reaction time, a yellow-colored precipitate formed. The reaction mixture was filtered through a fine-porosity frit, and the residue was washed with toluene ( $2 \times 2$  mL). The residue was then collected and dissolved in THF to make a saturated solution and kept at  $-30$

°C in the freezer to afford analytically pure, yellow-colored crystals of compound **6**. Crystal yield: 38 %.

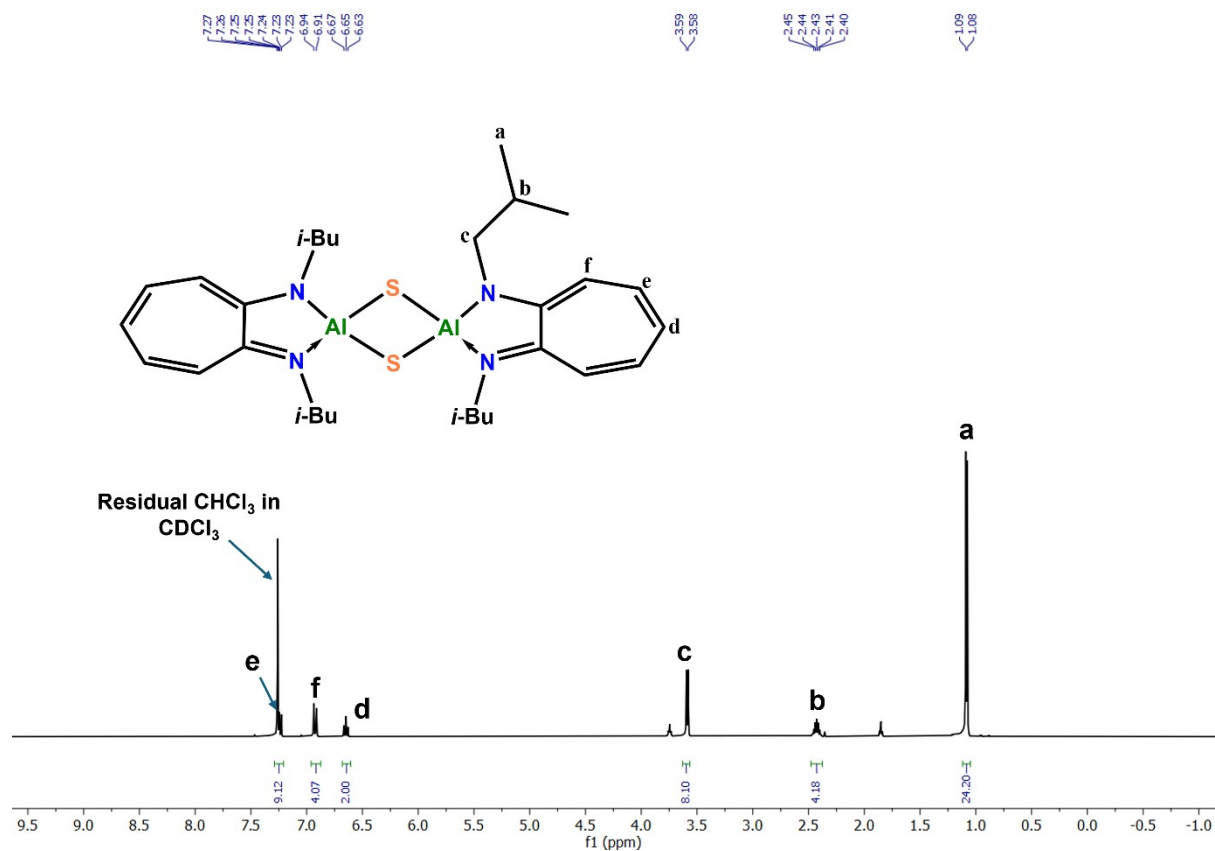

**Figure S22:**  $^1\text{H}$  NMR (400 MHz,  $\text{CDCl}_3$ , 298 K) of **6**, integration e is higher than expected due to the merging of residual  $\text{CHCl}_3$  in  $\text{CDCl}_3$  solvent, impurities are present (THF and toluene).

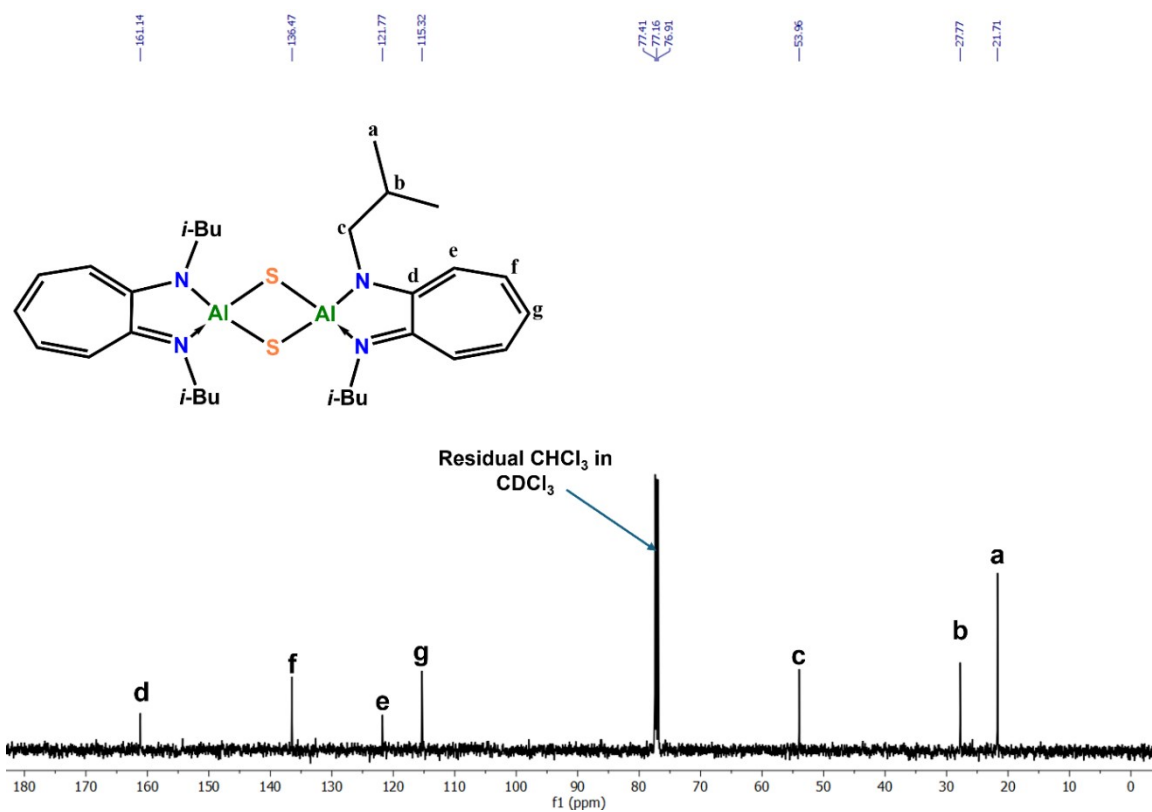

Fig

re S23:  $^{13}\text{C}\{^1\text{H}\}$  NMR (101 MHz,  $\text{CDCl}_3$ , 298 K) of **6**.

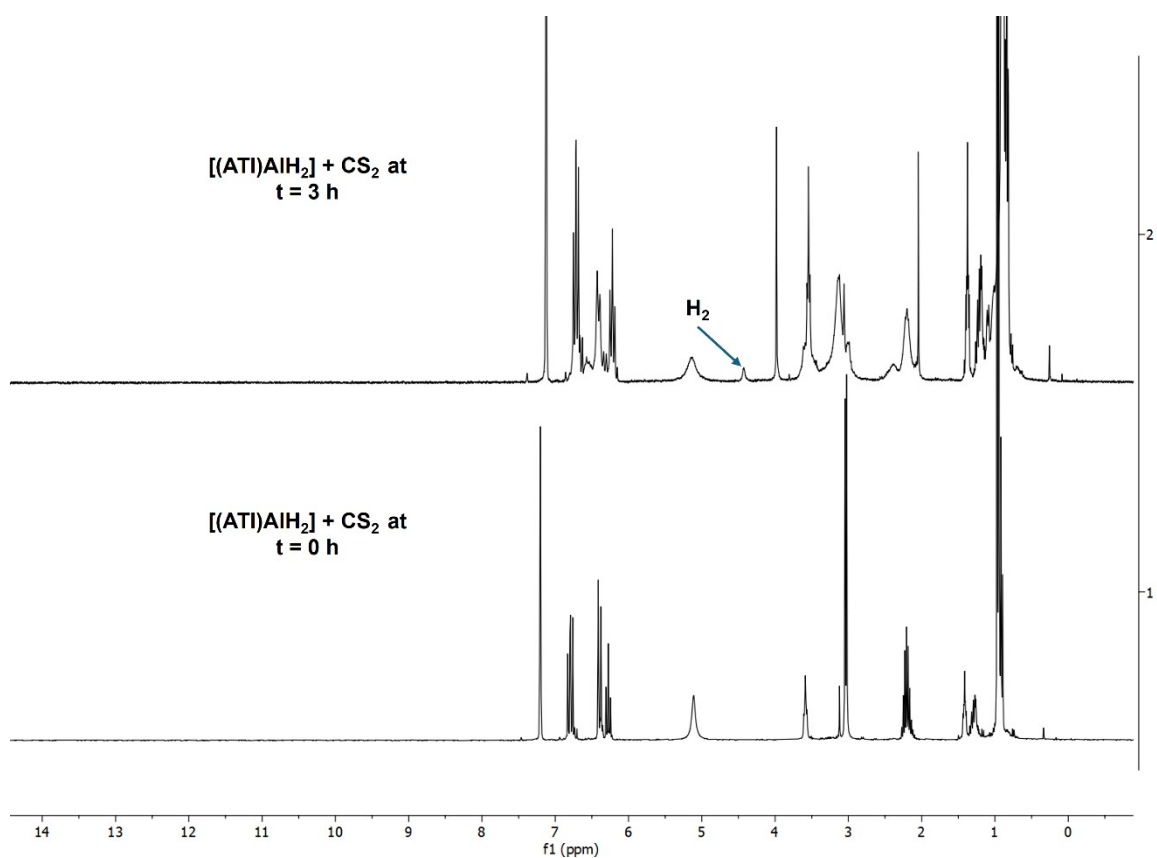

**Figure S24:** Stacked  $^1\text{H}$ -NMR spectra of **2** +  $\text{CS}_2$  at 0 h and 3 h. The reaction of compound **2** with  $\text{CS}_2$  was monitored in  $\text{C}_6\text{D}_6$  using a J-Young NMR tube. In  $\text{C}_6\text{D}_6$ , the reaction proceeds

slower than in toluene (with stirring); NMR spectra were recorded at time (t) = 0 and after 3 h at room temperature. The appearance of an H<sub>2</sub> signal was observed, without any thioformate peak, along with broadening of the other resonances. This broadening is attributed to the formation of compound **6**, which is insoluble in C<sub>6</sub>D<sub>6</sub>. The formation of a precipitate was also evident inside the NMR tube.

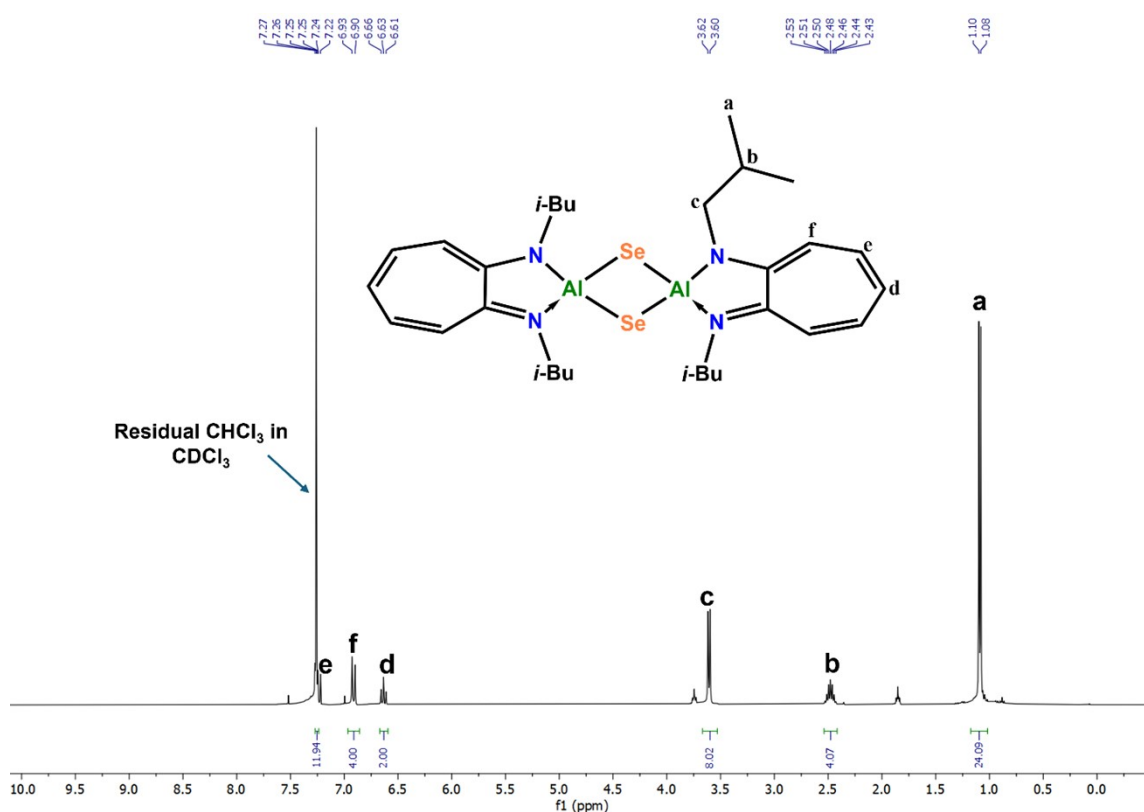

**Figure S25:** <sup>1</sup>H NMR (400 MHz, CDCl<sub>3</sub>, 298 K) of **7**, integration e is higher than expected due to the merging of residual CHCl<sub>3</sub> in CDCl<sub>3</sub> solvent, impurity is present (THF).

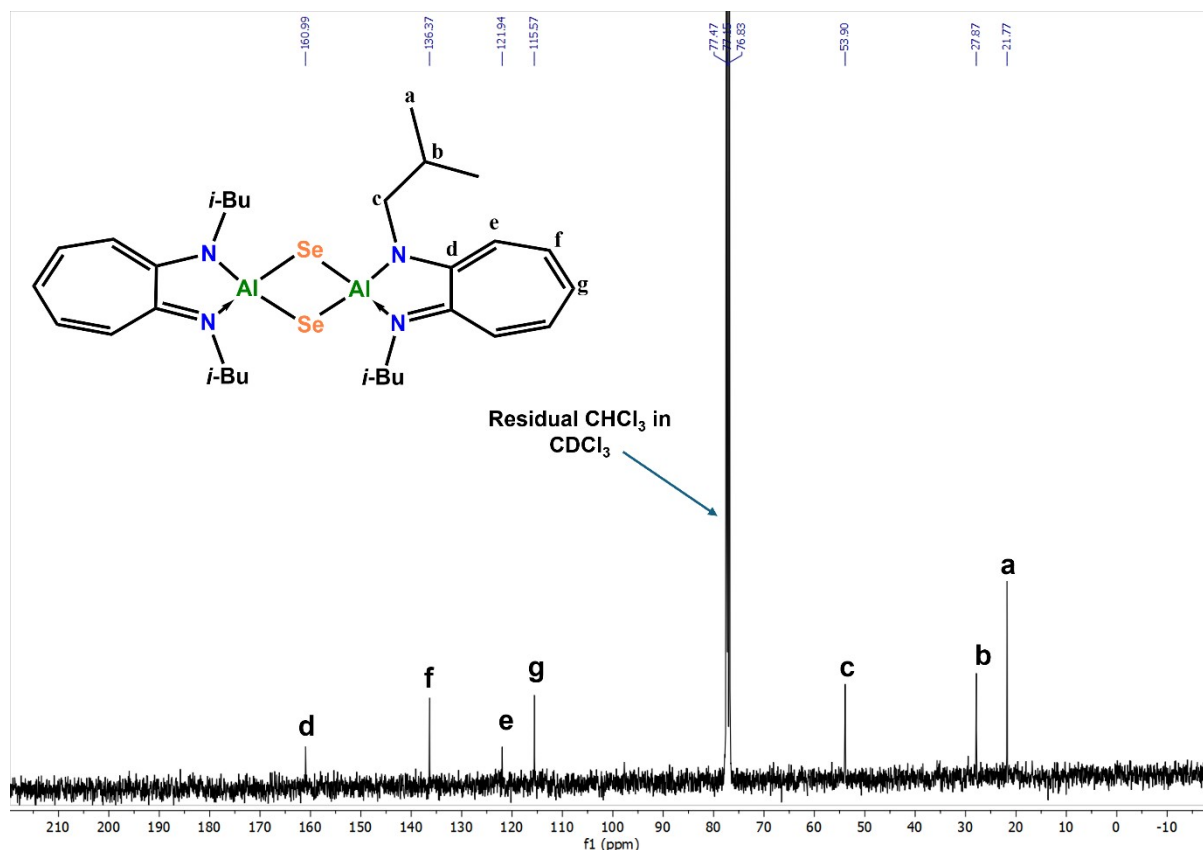

Figure S26:  $^{13}\text{C}\{^1\text{H}\}$  NMR (101 MHz,  $\text{CDCl}_3$ , 298 K) of **7**.

### Crystal structure refinements:

Single crystal X-ray diffraction (SCXRD) was measured on a Bruker D8 Venture diffractometer equipped with a Photon II CMOS area detector using Mo- $\text{K}\alpha$  radiation from a microfocus source (Bruker AXS, Madison, WI, USA). Crystals were cooled to the collection temperatures under streams of cold  $\text{N}_2$  using a Cryostream 800 cryostat (Oxford Cryosystems, Long Hanborough, UK). Hemispheres of data were collected using strategies of scans about the omega and phi axes with  $0.5^\circ$  frame widths. The Bruker Apex4 software suite was used for data collection, unit cell determination, data reduction, absorption correction and scaling, and space group determination.<sup>1</sup>

The crystal structures of **1**, **3**, **6**, and **7** were solved by direct methods as implemented in SHELXS v.2013.<sup>2</sup> The structures of **2**, **4**, and **5** were solved by an iterative dual space method as implemented in SHELXT. The **3** was integrated as a 2-component twin with the domains related by a 2-fold rotation parallel to a reciprocal unit cell body diagonal. The minor domain refined to a volume fraction of 30.8(4)%. All structures were refined by full-matrix least squares refinement against  $F^2$  using SHELXL v.2019/3.<sup>3</sup> Olex2 was used as a graphical interface for model building and visualization.<sup>4</sup> Non-hydrogen atoms were refined anisotropically. Disordered isopropyl groups were refined with minor parts restrained to have the same geometry as the major parts. Hydrogen atoms bonded to carbon were placed in calculated positions and were constrained to ride on the carrier atoms, except for **4** in which all hydrogen

atom coordinates were refined. Metal hydride ligands were located from the difference maps, and their coordinates were refined freely. Hydrogen atom thermal parameters were constrained to ride on the carrier atoms.

|                                                                                      | <b>1</b>                                                         | <b>2 · 2(THF)</b>                                                              |
|--------------------------------------------------------------------------------------|------------------------------------------------------------------|--------------------------------------------------------------------------------|
| CCDC Number                                                                          | 2532228                                                          | 2532229                                                                        |
| Formula                                                                              | C <sub>15</sub> H <sub>24</sub> N <sub>2</sub> SiCl <sub>2</sub> | C <sub>68</sub> H <sub>116</sub> N <sub>8</sub> O <sub>2</sub> Al <sub>4</sub> |
| <i>F</i> <sub>w</sub> / g·mol <sup>-1</sup>                                          | 331.35                                                           | 1185.60                                                                        |
| Temperature/K                                                                        | 173.0                                                            | 173.0                                                                          |
| cryst. color, habit                                                                  | Yellow block                                                     | Yellow block                                                                   |
| crystal size / mm                                                                    | 0.08x0.14x0.21                                                   | 0.01x0.01x0.04                                                                 |
| crystal system                                                                       | Monoclinic                                                       | Monoclinic                                                                     |
| space group                                                                          | <i>P</i> 2 <sub>1</sub> / <i>n</i>                               | <i>P</i> 2 <sub>1</sub> / <i>c</i>                                             |
| <i>a</i> /Å                                                                          | 9.3108(5)                                                        | 14.1971(8)                                                                     |
| <i>b</i> /Å                                                                          | 15.1785(8)                                                       | 16.5632(8)                                                                     |
| <i>c</i> /Å                                                                          | 12.2478(6)                                                       | 16.4240(9)                                                                     |
| $\alpha$ /°                                                                          | 90                                                               | 90                                                                             |
| $\beta$ /°                                                                           | 93.940(2)                                                        | 112.512(2)                                                                     |
| $\gamma$ /°                                                                          | 90                                                               | 90                                                                             |
| Volume/Å <sup>3</sup>                                                                | 1726.8(2)                                                        | 3567.8(3)                                                                      |
| <i>Z</i>                                                                             | 4                                                                | 2                                                                              |
| $\rho_{\text{calc}}$ /cm <sup>3</sup>                                                | 1.275                                                            | 1.104                                                                          |
| $\mu$ /mm <sup>-1</sup>                                                              | 0.438                                                            | 0.112                                                                          |
| <i>F</i> (000)                                                                       | 704                                                              | 1296                                                                           |
| $\theta$ range for data collection/°                                                 | 2.571-28.278                                                     | 2.535-26.372                                                                   |
| Reflections collected                                                                | 60804                                                            | 115191                                                                         |
| Independ. reflns, <i>R</i> <sub>int</sub>                                            | 4212, 0.0459                                                     | 7270, 0.0529                                                                   |
| data/ restr./ param.                                                                 | 4212/0/253                                                       | 7270/0/345                                                                     |
| <i>R</i> <sub>1</sub> , <i>wR</i> <sub>2</sub> [ <i>I</i> > 2 $\sigma$ ( <i>I</i> )] | 0.0375, 0.0735                                                   | 0.0461, 0.1280                                                                 |
| <i>R</i> <sub>1</sub> , <i>wR</i> <sub>2</sub> (all data)                            | 0.0503, 0.0787                                                   | 0.0556, 0.1354                                                                 |
| Goof on <i>F</i> <sup>2</sup>                                                        | 1.146                                                            | 1.069                                                                          |
| largest diff. peak, hole / e·Å <sup>-3</sup>                                         | 0.730, -0.228                                                    | 0.479, -0.340                                                                  |

|                                                                                      | <b>3</b>                                         | <b>4</b>                                          | <b>5</b>                                                         |
|--------------------------------------------------------------------------------------|--------------------------------------------------|---------------------------------------------------|------------------------------------------------------------------|
| CCDC Number                                                                          | 2538185                                          | 2532230                                           | 2532231                                                          |
| Formula                                                                              | C <sub>30</sub> H <sub>47</sub> AlN <sub>4</sub> | C <sub>30</sub> H <sub>47</sub> N <sub>4</sub> Al | C <sub>15</sub> H <sub>23</sub> N <sub>2</sub> AlCl <sub>2</sub> |
| <i>F</i> <sub>w</sub> / g·mol <sup>-1</sup>                                          | 490.69                                           | 490.69                                            | 329.23                                                           |
| Temperature/K                                                                        | 173.0 K                                          | 173.0                                             | 173.0                                                            |
| cryst. color, habit                                                                  | Yellow block                                     | Yellow block                                      | Yellow prism                                                     |
| crystal size / mm                                                                    | 0.11 x 0.06 x 0.06                               | 0.03x0.10x0.12                                    | 0.03x0.08x0.16                                                   |
| crystal system                                                                       | Triclinic                                        | Monoclinic                                        | Monoclinic                                                       |
| space group                                                                          | <i>P</i> -1                                      | <i>P</i> 2 <sub>1</sub> / <i>n</i>                | <i>P</i> 2 <sub>1</sub> / <i>n</i>                               |
| <i>a</i> /Å                                                                          | 9.7577(10)                                       | 10.6065(5)                                        | 13.1830(7)                                                       |
| <i>b</i> /Å                                                                          | 12.7902(14)                                      | 19.848(1)                                         | 8.9346(4)                                                        |
| <i>c</i> /Å                                                                          | 13.6017(15)                                      | 14.3414(7)                                        | 15.4846(8)                                                       |
| $\alpha$ /°                                                                          | 97.307(4)                                        | 90                                                | 90                                                               |
| $\beta$ /°                                                                           | 109.658(4)                                       | 89.965(2)                                         | 108.115(2)                                                       |
| $\gamma$ /°                                                                          | 106.332(4)                                       | 90                                                | 90                                                               |
| Volume/Å <sup>3</sup>                                                                | 1487.2(3)                                        | 3002.7(3)                                         | 1733.4(2)                                                        |
| <i>Z</i>                                                                             | 2                                                | 4                                                 | 4                                                                |
| $\rho_{\text{calc}}$ /cm <sup>3</sup>                                                | 1.096                                            | 1.085                                             | 1.262                                                            |
| $\mu$ /mm <sup>-1</sup>                                                              | 0.092                                            | 0.091                                             | 0.418                                                            |
| <i>F</i> (000)                                                                       | 536                                              | 1072                                              | 696                                                              |
| 2 $\theta$ range for data collection/°                                               | 2.059 to 26.395                                  | 2.190-28.150                                      | 2.667-28.230                                                     |
| Reflections collected                                                                | 5846                                             | 102444                                            | 42793                                                            |
| Independ. reflns, <i>R</i> <sub>int</sub>                                            | 5846                                             | 7421, 0.0800                                      | 4283, 0.0573                                                     |
| data/ restr./ param.                                                                 | 5846 / 0 / 328                                   | 7421/0/457                                        | 4283/3/253                                                       |
| <i>R</i> <sub>1</sub> , <i>wR</i> <sub>2</sub> [ <i>I</i> > 2 $\sigma$ ( <i>I</i> )] | 0.1046, 0.2255                                   | 0.0521, 0.1110                                    | 0.0340, 0.0812                                                   |
| <i>R</i> <sub>1</sub> , <i>wR</i> <sub>2</sub> (all data)                            | 0.1544, 0.2536                                   | 0.0975, 0.1364                                    | 0.0441, 0.0904                                                   |
| GooF on <i>F</i> <sup>2</sup>                                                        | 1.242                                            | 1.099                                             | 1.061                                                            |
| largest diff. peak, hole / e·Å <sup>-3</sup>                                         | 0.489 and -0.562                                 | 0.292, -0.300                                     | 0.333, -0.221                                                    |

|                                                                             | <b>6</b>                                                                      | <b>7</b>                                                                       |
|-----------------------------------------------------------------------------|-------------------------------------------------------------------------------|--------------------------------------------------------------------------------|
| CCDC Number                                                                 | 2532232                                                                       | 2532233                                                                        |
| Formula                                                                     | C <sub>30</sub> H <sub>46</sub> N <sub>4</sub> Al <sub>2</sub> S <sub>2</sub> | C <sub>30</sub> H <sub>46</sub> N <sub>4</sub> Al <sub>2</sub> Se <sub>2</sub> |
| <i>F</i> <sub>w</sub> / g·mol <sup>-1</sup>                                 | 580.79                                                                        | 674.63                                                                         |
| Temperature/K                                                               | 173.0                                                                         | 173.0                                                                          |
| cryst. color, habit                                                         | Yellow prism                                                                  | Yellow block                                                                   |
| crystal size / mm                                                           | 0.03x0.11x0.21                                                                | 0.04x0.06x0.09                                                                 |
| crystal system                                                              | Orthorhombic                                                                  | Orthorhombic                                                                   |
| space group                                                                 | <i>Pbca</i>                                                                   | <i>Pbca</i>                                                                    |
| <i>a</i> /Å                                                                 | 11.6862(8)                                                                    | 11.708(5)                                                                      |
| <i>b</i> /Å                                                                 | 16.610(1)                                                                     | 16.543(6)                                                                      |
| <i>c</i> /Å                                                                 | 16.715(2)                                                                     | 17.501(6)                                                                      |
| α/°                                                                         | 90                                                                            | 90                                                                             |
| β/°                                                                         | 90                                                                            | 90                                                                             |
| γ/°                                                                         | 90                                                                            | 90                                                                             |
| Volume/Å <sup>3</sup>                                                       | 3244.4(4)                                                                     | 3390(2)                                                                        |
| <i>Z</i>                                                                    | 4                                                                             | 4                                                                              |
| ρ <sub>calc</sub> /cm <sup>3</sup>                                          | 1.189                                                                         | 1.322                                                                          |
| μ/mm <sup>-1</sup>                                                          | 0.243                                                                         | 2.257                                                                          |
| <i>F</i> (000)                                                              | 1248                                                                          | 1392                                                                           |
| 2θ range for data collection/°                                              | 2.452-27.116                                                                  | 2.327-27.090                                                                   |
| Reflections collected                                                       | 95717                                                                         | 103492                                                                         |
| Independ. reflns, <i>R</i> <sub>int</sub>                                   | 3570                                                                          | 3712                                                                           |
| data/ restr./ param.                                                        | 3570/0/190                                                                    | 3712/8/218                                                                     |
| <i>R</i> <sub>1</sub> , <i>wR</i> <sub>2</sub> [ <i>I</i> > 2σ( <i>I</i> )] | 0.0906, 0.1900                                                                | 0.0382, 0.0922                                                                 |
| <i>R</i> <sub>1</sub> , <i>wR</i> <sub>2</sub> (all data)                   | 0.0614, 0.1602                                                                | 0.0740, 0.1203                                                                 |
| GooF on <i>F</i> <sup>2</sup>                                               | 1.093                                                                         | 1.080                                                                          |
| largest diff. peak, hole / e·Å <sup>-3</sup>                                | 0.438, -0.354                                                                 | 0.858, -0.558                                                                  |

## References:

1. Apex4, AXScale, and SAINT, version 2022.1, Bruker AXS, Inc., Madison, WI, 2022.
2. G. M. Sheldrick, SHELXS, v.2013-1, 2013.
3. G. M. Sheldrick, *SHELXT* – Integrated space-group and crystal-structure determination. *Acta Cryst. Sect. A: Found. Adv.*, 2015, **71**, 3-8.
4. G. M. Sheldrick, Crystal structure refinement with *SHELXL*. *Acta Cryst. Sect. C. Struct., Chem.* 2015, **71**, 3-8.
